# Supplementary material for: Theoretical studies of hydrogen abstraction from H2X and CH3XH (X = O, S) by trichloromethyl radicals
Source: Royal Society of Chemistry journal article supplement (doi:10.1039/c8cp07677d), 2019-01-01
Supplement: c8cp07677d1.pdf [file c8cp07677d1.pdf]

## **Theoretical Studies of Hydrogen Abstraction from H<sub>2</sub>X and CH<sub>3</sub>XH (X=O, S) by Trichloromethyl Radical**

*Jagannath Pal and Ranga Subramanian\**

Department of Chemistry, Indian Institute of Technology Patna, India 801103

\*Email: ranga@iitp.ac.in; Fax: +91-612-3028123

### **Supplementary data**

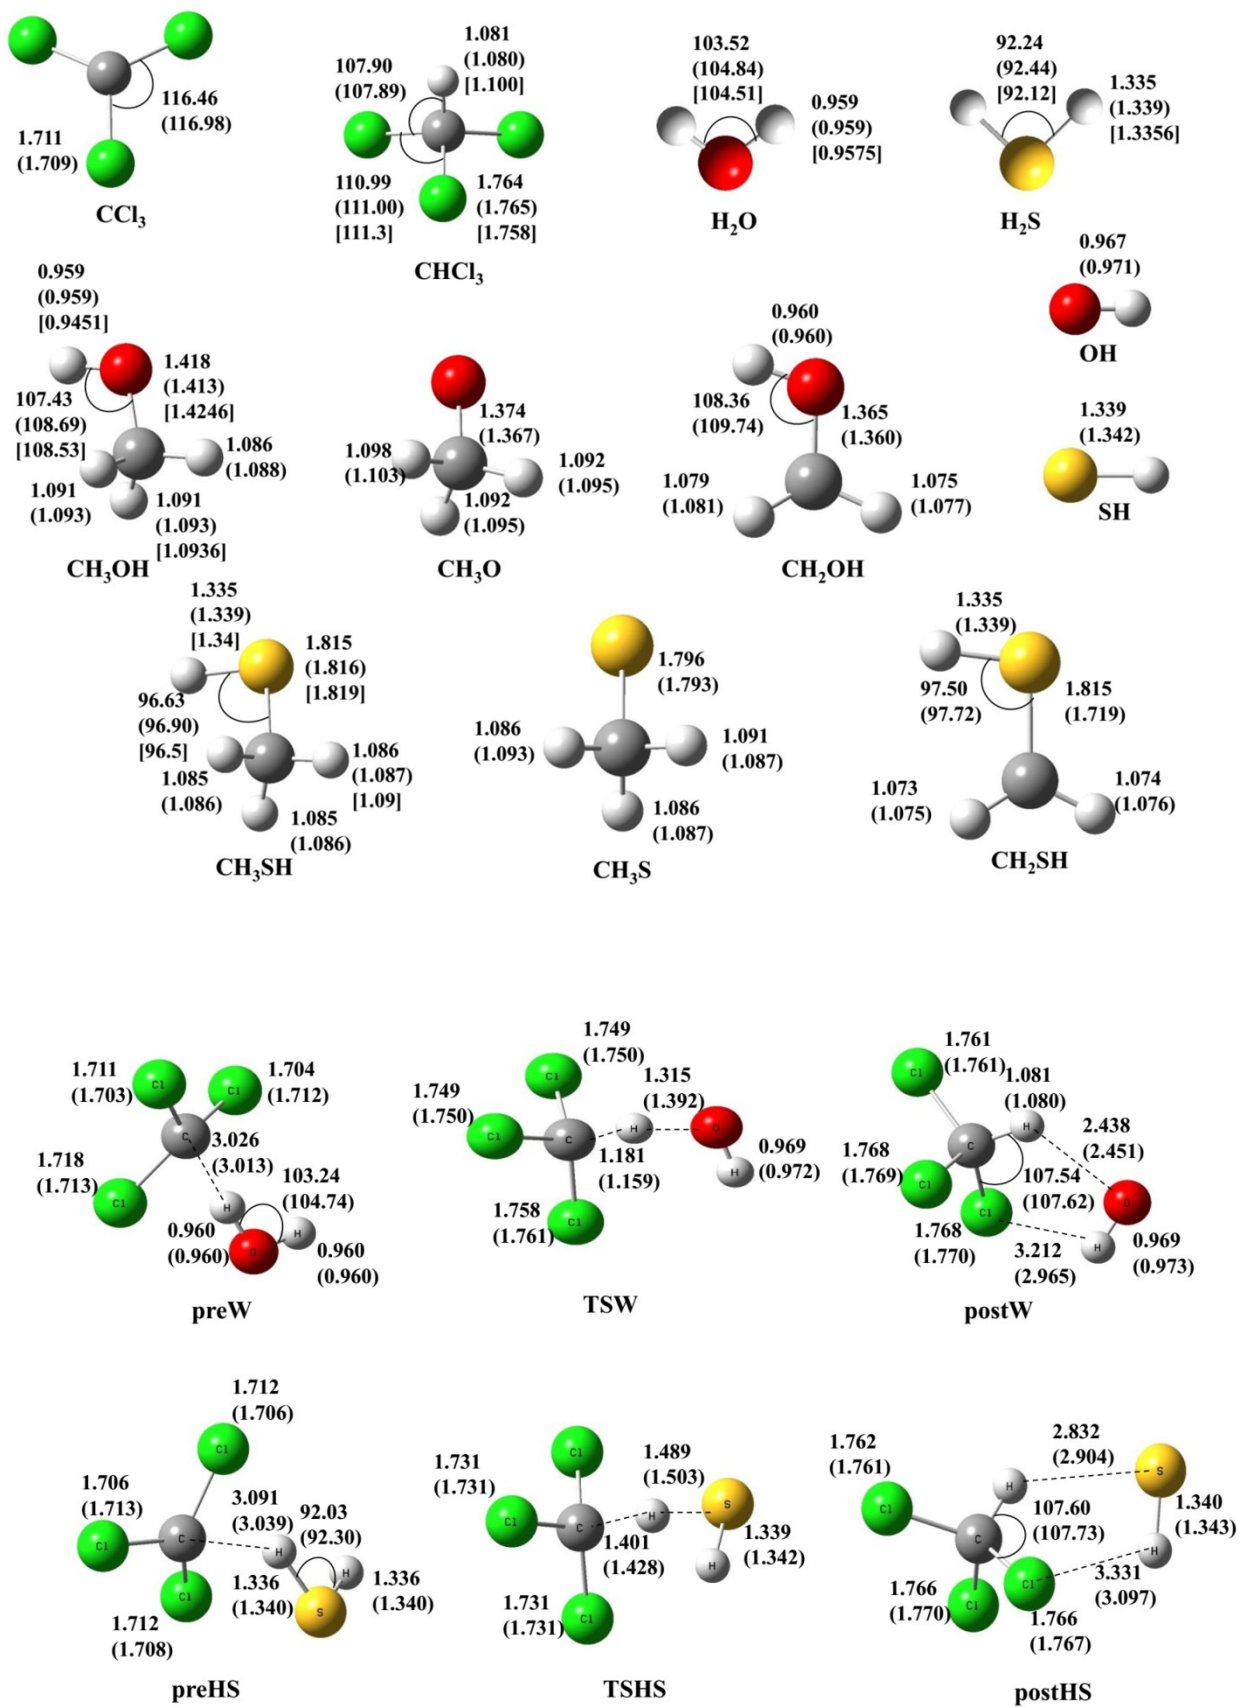

Figure S1. (Continued)

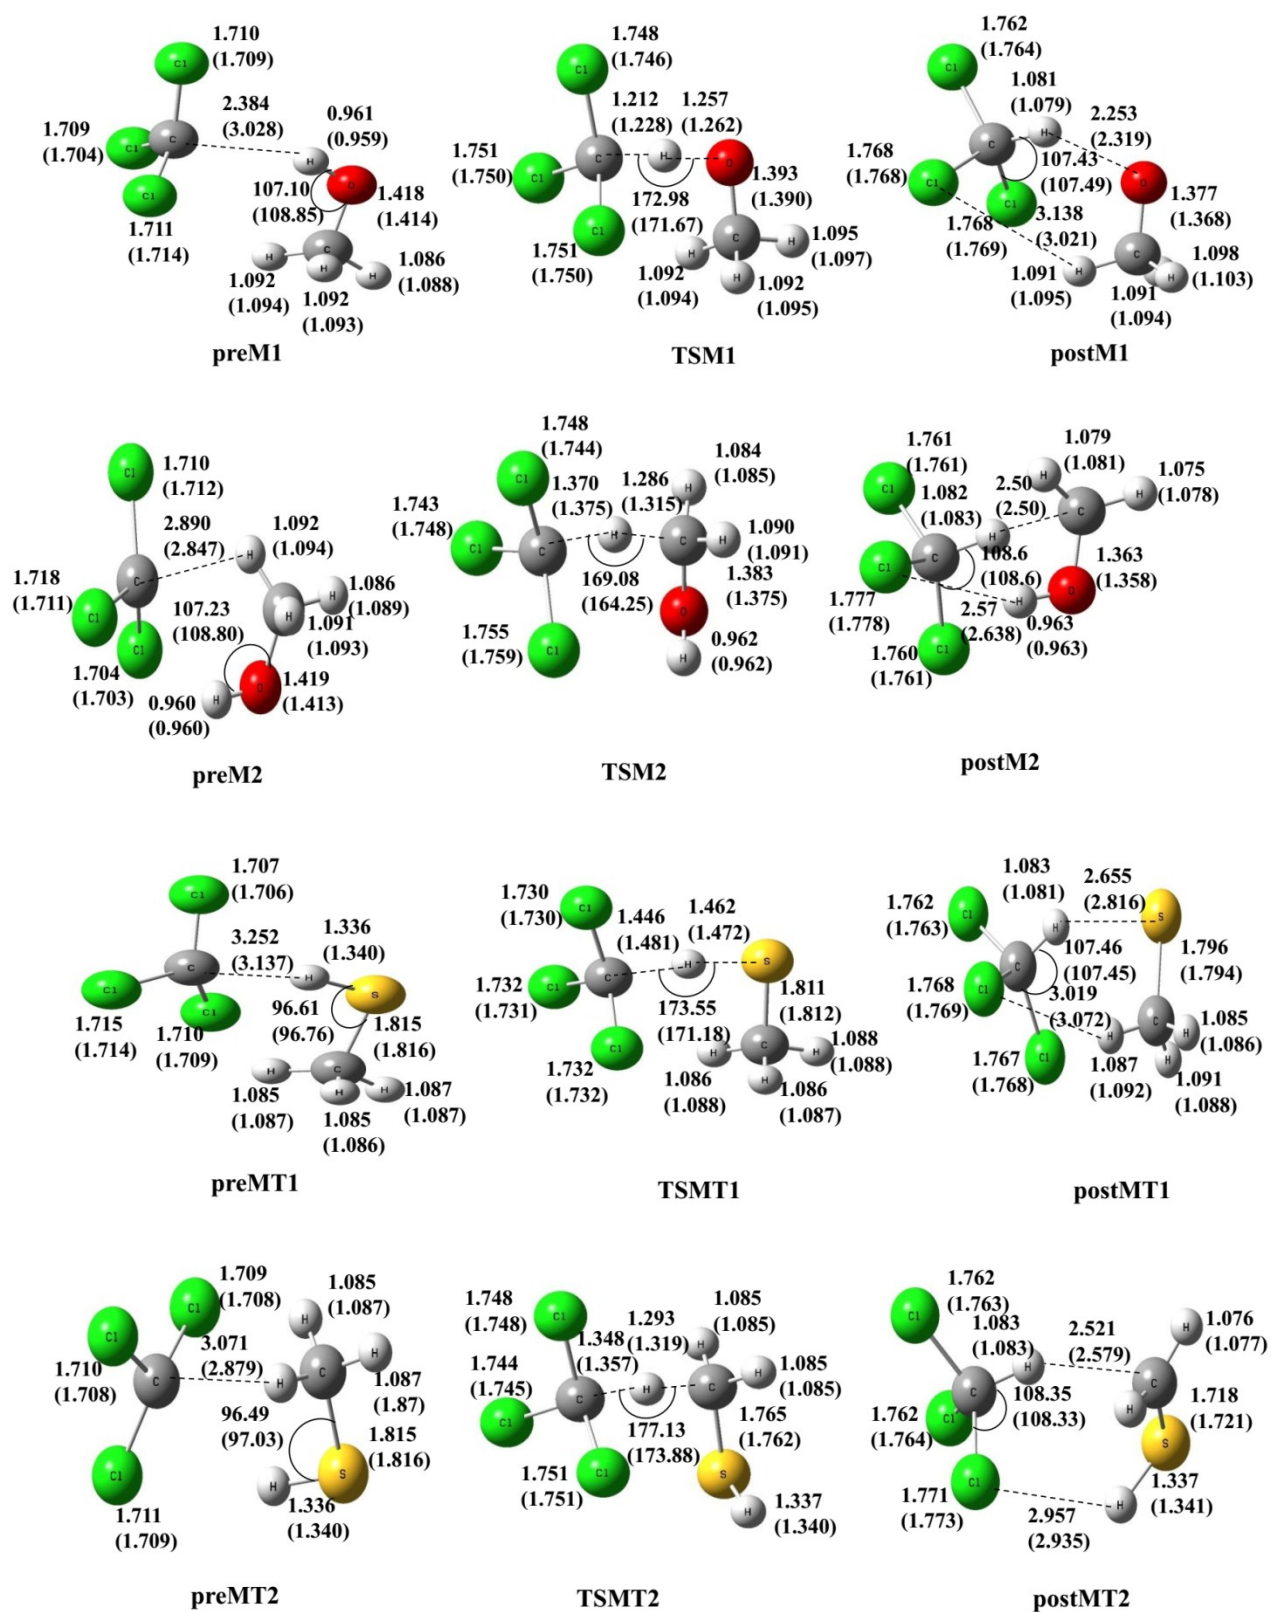

**Figure S1.** Optimized geometries of the reactants, products, transition states, and complexes at the MP2/cc-pVTZ, M06-2X/cc-pVTZ (in parentheses) levels and the limited experimental values (in square brackets). Bond lengths are in angstroms and angles in degree.

**Table S1.** Total Electronic Energy and Zero-point Vibrational Energy for the M06-2X/cc-pVTZ and MP2/cc-pVTZ Geometries (Hartree).

| Species            | M06-2X/cc-pVTZ |          | MP2/cc-pVTZ |          |
|--------------------|----------------|----------|-------------|----------|
|                    | E              | ZPE      | E           | ZPE      |
| CCl <sub>3</sub>   | -1418.652018   | 0.007352 | -1417.07847 | 0.007478 |
| H <sub>2</sub> O   | -76.425274     | 0.021592 | -76.318657  | 0.021604 |
| H <sub>2</sub> S   | -399.385798    | 0.015268 | -398.903648 | 0.015467 |
| CH <sub>3</sub> OH | -115.714121    | 0.051801 | -115.517475 | 0.052058 |
| CH <sub>3</sub> SH | -438.688801    | 0.046376 | -438.119887 | 0.046747 |
| CHCl <sub>3</sub>  | -1419.308949   | 0.02024  | -1417.7376  | 0.020296 |
| OH                 | -75.730487     | 0.008601 | -75.618907  | 0.008704 |
| HS                 | -398.737787    | 0.006177 | -398.256334 | 0.006296 |
| CH <sub>3</sub> O  | -115.039487    | 0.036944 | -114.83443  | 0.037672 |
| CH <sub>2</sub> OH | -115.052655    | 0.037669 | -114.855666 | 0.038037 |
| CH <sub>3</sub> S  | -438.046942    | 0.035765 | -437.477604 | 0.036262 |
| CH <sub>2</sub> SH | -438.026934    | 0.031761 | -437.457235 | 0.032063 |
| TSW                | -1495.036256   | 0.026047 | -1493.34705 | 0.025671 |
| TSHS               | -1818.027273   | 0.021358 | -1815.97124 | 0.021571 |
| TSM1               | -1534.340195   | 0.054195 | -1532.56029 | 0.030867 |
| TSM2               | -1534.345674   | 0.055417 | -1532.57464 | 0.05581  |
| TSMT1              | -1857.333414   | 0.051456 | -1855.19125 | 0.052022 |
| TSMT2              | -1857.319399   | 0.049576 | -1855.17722 | 0.050339 |
| preW               | -1495.081433   | 0.030176 | -1493.40016 | 0.030144 |
| preHS              | -1818.041192   | 0.024191 | -1815.98485 | 0.023744 |
| preM1              | -1534.371272   | 0.060323 | -1532.5999  | 0.060224 |
| preM2              | -1534.371612   | 0.060372 | -1532.6002  | 0.060305 |
| preMT1             | -1857.345995   | 0.054765 | -1855.2026  | 0.054829 |
| preMT2             | -1857.345383   | 0.054992 | -1855.20245 | 0.054811 |
| postW              | -1495.047365   | 0.030614 | -1493.36218 | 0.030107 |
| postHS             | -1818.052993   | 0.028002 | -1815.99859 | 0.027365 |
| postM1             | -1534.35686    | 0.058765 | -1532.57952 | 0.05926  |
| postM2             | -1534.370626   | 0.059469 | -1532.60083 | 0.059653 |
| postMT1            | -1857.363573   | 0.057906 | -1855.22241 | 0.057959 |
| postMT2            | -1857.343299   | 0.053644 | -1855.2017  | 0.05396  |

**Table S2.** Calculated frequencies (Experimental values in parenthesis) (in  $\text{cm}^{-1}$ ) for the reactants, products, transition states, and complexes for the title reactions at the MP2/cc-pVTZ level.

| Species                | MP2/cc-pVTZ                                                                                                                                                 |
|------------------------|-------------------------------------------------------------------------------------------------------------------------------------------------------------|
| $\text{CCl}_3$         | 277, 277, 366, 519, 922, 922                                                                                                                                |
| $\text{H}_2\text{O}$   | 1652 (1595), 3855 (3657), 3976 (3756)                                                                                                                       |
| $\text{H}_2\text{S}$   | 1211 (1183), 2780 (2615), 2799 (2626),                                                                                                                      |
| $\text{CH}_3\text{OH}$ | 309 (295), 1069 (1033), 1104 (1060), 1188 (1165), 1387 (1345), 1497 (1455),<br>1522 (1477), 1537 (1477), 3053 (2844), 3121 (2960), 3183 (3000), 3882 (3681) |
| $\text{CH}_3\text{SH}$ | 243, 737, 810, 986, 1104, 1368, 1493, 1507, 1773, 3098, 3199, 3201                                                                                          |
| $\text{CHCl}_3$        | 265 (261), 265 (261), 374 (363), 691 (680), 803 (774), 803 (774), 1252 (1220),<br>1252 (1220), 3204 (3034)                                                  |
| OH                     | 3821 (3775)                                                                                                                                                 |
| HS                     | 2764                                                                                                                                                        |
| $\text{CH}_3\text{O}$  | 806, 977, 1136, 1413, 1431, 1541, 3010, 3091, 3131                                                                                                          |
| $\text{CH}_2\text{OH}$ | 440, 647, 1074, 1225, 1381, 1517, 3192, 3341, 3880                                                                                                          |
| $\text{CH}_3\text{S}$  | 620, 744, 880, 1346, 1417, 1494, 3070, 3161, 3184                                                                                                           |
| $\text{CH}_2\text{SH}$ | 131, 361, 796, 866, 1084, 1442, 2780, 3239, 3374                                                                                                            |
| TSW                    | 1979i, 68, 97, 105, 267, 268, 332, 501, 722, 836, 849, 887, 1129, 1409, 3796,                                                                               |
| TSHS                   | 1538i, 49, 76, 95, 228, 272, 273, 445, 549, 841, 847, 874, 920, 1237, 2763                                                                                  |
| TSM1                   | 2493i, 34, 85, 95, 151, 206, 269, 278, 340, 484, 806, 829, 845, 1062, 1139,<br>1147, 1180, 1399, 1434, 1454, 1532, 3025, 3105, 3130                         |
| TSM2                   | 1806i, 33, 59, 84, 168, 264, 271, 319, 361, 448, 565, 787, 832, 846, 1100,<br>1162, 1214, 1388, 1459, 1473, 1514, 3089, 3215, 3847                          |
| TSMT1                  | 1375i, 30, 69, 84, 112, 147, 243, 273, 278, 449, 740, 829, 859, 876, 890, 959,<br>984, 1226, 1355, 1480, 1497, 3084, 3182, 3190,                            |
| TSMT2                  | 1804i, 29, 52, 78, 140, 247, 269, 273, 311, 446, 538, 775, 796, 834, 840, 863,<br>1061, 1121, 1420, 1429, 1448, 2767, 3129, 3229                            |
| preW                   | 18, 42, 57, 78, 106, 183, 276, 277, 369, 519, 912, 931, 1652, 3848, 3964                                                                                    |
| preHS                  | 14, 31, 48, 53, 101, 119, 276, 277, 365, 515, 917, 929, 1208, 2775, 2793                                                                                    |
| preM1                  | 20, 26, 39, 67, 77, 87, 277, 277, 328, 377, 525, 920, 924, 1070, 1104, 1189,<br>1390, 1494, 1520, 1534, 3050, 3119, 3178, 3844                              |
| preM2                  | 18, 31, 40, 69, 72, 100, 276, 277, 341, 370, 516, 912, 933, 1069, 1103, 1188,<br>1389, 1494, 1520, 1534, 3051, 3119, 3181, 3869                             |
| preMT1                 | 19, 26, 31, 55, 65, 89, 253, 277, 277, 360, 511, 736, 809, 917, 929, 987, 1102,<br>1367, 1489, 1505, 2768, 3097, 3197, 3202                                 |
| preMT2                 | 9, 24, 41, 48, 66, 88, 246, 276, 277, 369, 519, 736, 806, 921, 924, 986, 1100,<br>1366, 1491, 1504, 2769, 3095, 3196, 3200                                  |
| postW                  | 26, 38, 69, 103, 238, 265, 272, 374, 689, 793, 810, 1249, 1269, 3221, 3800                                                                                  |
| postHS                 | 2, 33, 46, 70, 192, 265, 267, 374, 689, 795, 807, 1251, 1265, 2757, 3200                                                                                    |
| postM1                 | 27, 41, 44, 81, 92, 117, 265, 266, 375, 688, 793, 805, 920, 983, 1129, 1262,<br>1285, 1409, 1429, 1539, 3009, 3097, 3143, 3215                              |

|         |                                                                                                                              |
|---------|------------------------------------------------------------------------------------------------------------------------------|
| postM2  | 17, 47, 65, 87, 109, 187, 265, 267, 374, 518, 678, 687, 789, 812, 1082, 1223, 1259, 1269, 1389, 1514, 3188, 3191, 3339, 3828 |
| postMT1 | 22, 26, 45, 74, 77, 93, 265, 266, 375, 687, 739, 787, 804, 820, 935, 1265, 1278, 1346, 1440, 1492, 3071, 3161, 3180, 3194    |
| postMT2 | 19, 36, 56, 69, 90, 152, 265, 266, 351, 375, 474, 688, 792, 801, 806, 865, 1088, 1256, 1268, 1439, 2765, 3185, 3221, 3355    |

**Table S3.** Cartesian coordinates for the reactants, products, transition states, and complexes for the title reactions at the M06-2X/cc-pVTZ level.

| Species            | M06-2X/cc-pVTZ |             |             |             |
|--------------------|----------------|-------------|-------------|-------------|
| CCl <sub>3</sub>   | C              | 0.10136200  | -0.17536900 | 0.07160400  |
|                    | Cl             | -0.03728300 | 0.06446800  | 1.75792800  |
|                    | Cl             | 1.64506800  | 0.06457800  | -0.62110300 |
|                    | Cl             | -0.87947500 | -1.39071000 | -0.62176200 |
| H <sub>2</sub> O   | O              | -0.01672900 | 0.00000000  | -0.01182300 |
|                    | H              | 0.02223700  | 0.00000000  | 0.94628300  |
|                    | H              | 0.89942800  | 0.00000000  | -0.29491400 |
| H <sub>2</sub> S   | S              | -0.09260900 | 0.00000000  | -0.06538700 |
|                    | H              | 0.10593500  | 0.00000000  | 1.25829600  |
|                    | H              | 1.22153500  | 0.00000000  | -0.32019600 |
| CH <sub>3</sub> OH | C              | 0.00477900  | 0.00775600  | -0.01791700 |
|                    | H              | -0.01719900 | -0.02805100 | 1.06894900  |
|                    | H              | 1.04999100  | 0.01207500  | -0.33862100 |
|                    | H              | -0.46586700 | 0.94100600  | -0.33869400 |
|                    | O              | -0.69202000 | -1.12932300 | -0.48347800 |
|                    | H              | -0.68745900 | -1.12129500 | -1.44195800 |
| CH <sub>3</sub> SH | C              | 0.06275000  | 0.10128200  | 0.06447800  |
|                    | H              | 0.06330800  | 0.10582400  | 1.15124800  |
|                    | H              | 1.08961400  | 0.06973000  | -0.28716600 |
|                    | H              | -0.43213100 | 1.00047300  | -0.28997800 |
|                    | H              | -0.74343500 | -1.20629900 | -1.75632100 |
|                    | S              | -0.84787900 | -1.38884200 | -0.43398000 |
| CHCl <sub>3</sub>  | C              | 0.00000400  | 0.00000500  | -0.02870000 |
|                    | H              | -0.00018700 | -0.00000800 | 1.05171100  |
|                    | Cl             | 1.67985400  | 0.00000000  | -0.57112900 |
|                    | Cl             | -0.83983400 | -1.45475200 | -0.57094200 |
|                    | Cl             | -0.83983700 | 1.45475400  | -0.57094000 |
| OH                 | O              | 0.00000000  | 0.00000000  | -0.00571100 |
|                    | H              | 0.00000000  | 0.00000000  | 0.96571100  |
| HS                 | S              | 0.00000000  | 0.00000000  | -0.01616300 |
|                    | H              | 0.00000000  | 0.00000000  | 1.32616300  |
| CH <sub>3</sub> O  | C              | -0.00167400 | -0.00276400 | -0.02304600 |
|                    | H              | -0.00584900 | -0.00972000 | 1.07964100  |
|                    | H              | 1.04734800  | -0.01565300 | -0.33624000 |
|                    | H              | -0.50212000 | 0.91929100  | -0.33625400 |

|                    |      |             |             |             |
|--------------------|------|-------------|-------------|-------------|
|                    | O    | -0.68118800 | -1.12894500 | -0.39449300 |
| CH <sub>2</sub> OH | C    | 0.05965600  | -0.12532900 | 0.06401000  |
|                    | H    | -0.02254600 | 0.01734400  | 1.12873800  |
|                    | H    | 0.99894100  | 0.04185500  | -0.44400600 |
|                    | O    | -0.79217200 | -1.06481200 | -0.42806900 |
|                    | H    | -0.61543700 | -1.20576600 | -1.36058200 |
| CH <sub>3</sub> S  | C    | 0.00654700  | 0.01039800  | -0.00467800 |
|                    | H    | 0.00158600  | 0.00286800  | 1.08799000  |
|                    | H    | 1.04084700  | -0.00898600 | -0.33849200 |
|                    | H    | -0.49333900 | 0.91618800  | -0.33841800 |
|                    | S    | -0.88050400 | -1.45886200 | -0.52433700 |
| CH <sub>2</sub> SH | C    | 0.15901900  | -0.12185500 | 0.18794700  |
|                    | H    | 0.11548600  | 0.14004000  | 1.23072000  |
|                    | H    | 0.99169900  | 0.17357800  | -0.42479800 |
|                    | H    | -0.62305200 | -1.28466600 | -1.65671600 |
|                    | S    | -1.01471200 | -1.24380700 | -0.37706400 |
| TSW                | C    | -0.00137800 | -0.00114800 | 0.00000600  |
|                    | H    | -0.00447900 | -0.00380100 | 1.15929600  |
|                    | Cl   | 1.67759600  | 0.00321100  | -0.49407400 |
|                    | Cl   | -0.84257800 | -1.45118300 | -0.50314900 |
|                    | Cl   | -0.84173500 | 1.45845000  | -0.51331700 |
|                    | O    | -0.14739400 | 0.22160600  | 2.52518000  |
|                    | H    | -0.63983000 | 1.05871400  | 2.49505100  |
| TSHS               | C    | -0.01652600 | -0.11528500 | -0.01828400 |
|                    | H    | -0.15774200 | -0.45148100 | 1.36188400  |
|                    | Cl   | 1.62003100  | -0.52471700 | -0.40804000 |
|                    | Cl   | -1.20256600 | -1.12391700 | -0.77538600 |
|                    | Cl   | -0.36351900 | 1.57843300  | -0.10214600 |
|                    | H    | 0.72501300  | 0.05774400  | 3.09852200  |
|                    | S    | -0.27173300 | -0.79615400 | 2.82017400  |
| TSM1               | C    | -0.22185300 | -0.07710500 | -0.18837500 |
|                    | H    | -0.46377400 | 0.39076600  | 0.77131300  |
|                    | H    | 0.79732600  | -0.47556500 | -0.11111000 |
|                    | H    | -0.23177600 | 0.66623900  | -0.99063900 |
|                    | O    | -1.03194700 | -1.17284000 | -0.46281700 |
|                    | H    | -2.22397400 | -0.75790500 | -0.47730500 |
|                    | C    | -3.31534700 | -0.19715700 | -0.44140500 |
|                    | Cl   | -3.23379900 | 1.12144700  | -1.58954300 |
|                    | Cl   | -3.52209800 | 0.36433100  | 1.20318000  |
|                    | Cl   | -4.48255900 | -1.41417000 | -0.89230500 |
|                    | TSM2 | C           | -0.44584800 | -0.29583700 |
| H                  |      | -0.87224300 | -0.40821400 | 0.81265100  |
| H                  |      | 0.63505900  | -0.43765000 | -0.21479400 |
| H                  |      | -0.91307200 | -1.30693400 | -0.87788700 |
| O                  |      | -0.91275500 | 0.85333400  | -0.77241100 |
| H                  |      | -0.47276000 | 0.98007000  | -1.61815700 |
| C                  |      | -1.42110100 | -2.10207800 | -1.87860200 |
| Cl                 |      | -0.75195100 | -1.38337300 | -3.33792600 |
| Cl                 |      | -3.15804100 | -1.96345600 | -1.80470800 |

|       |    |             |             |             |
|-------|----|-------------|-------------|-------------|
|       | Cl | -0.84996000 | -3.73295300 | -1.61808800 |
| TSMT1 | C  | 0.04782500  | 0.09028500  | -0.02066800 |
|       | H  | 0.21781500  | 0.10480900  | 1.05347300  |
|       | H  | 0.99291100  | 0.03135800  | -0.55355100 |
|       | H  | -0.55227300 | -0.78427200 | -0.26447700 |
|       | C  | 1.06843300  | 3.27871000  | 0.77594800  |
|       | Cl | 0.66364300  | 4.91401500  | 0.38197000  |
|       | Cl | 0.87047300  | 2.87581200  | 2.44839400  |
|       | Cl | 2.55663100  | 2.72411400  | 0.08496900  |
|       | H  | 0.02086600  | 2.49756600  | 0.07890400  |
|       | S  | -0.90932300 | 1.53882100  | -0.53920600 |
| TSMT2 | C  | -0.26869100 | -0.20618700 | -0.12809600 |
|       | H  | -0.66086500 | -0.50234900 | 0.83949100  |
|       | H  | 0.77481500  | 0.08901600  | -0.09601300 |
|       | H  | -0.27537200 | -1.31917800 | -0.83668700 |
|       | H  | -0.54531000 | 1.27261700  | -1.92367900 |
|       | C  | -0.34150900 | -2.38637300 | -1.67274200 |
|       | Cl | 0.22373200  | -1.76971800 | -3.21142000 |
|       | Cl | -2.02473700 | -2.84517900 | -1.70917200 |
|       | Cl | 0.69520600  | -3.63478200 | -1.02265500 |
|       | S  | -1.35376900 | 0.94338900  | -0.90735800 |
| preW  | C  | 0.21634700  | 0.00853800  | -0.08738700 |
|       | H  | -0.42947300 | 1.33922100  | 2.53712100  |
|       | Cl | 1.64847300  | -0.62217900 | -0.75978800 |
|       | Cl | -1.15895600 | -1.01174600 | -0.08009900 |
|       | Cl | -0.07552200 | 1.68280600  | -0.30023500 |
|       | O  | -0.30697700 | 0.47229200  | 2.93036400  |
|       | H  | -1.06609400 | -0.03760300 | 2.63881400  |
|       |    |             |             |             |
| preHS | C  | 0.08160000  | -0.04321700 | -0.04471600 |
|       | H  | -0.20089400 | 0.25362300  | 2.96693100  |
|       | Cl | 1.53355800  | -0.04824900 | -0.93980500 |
|       | Cl | -0.76028500 | -1.52245200 | 0.09316600  |
|       | Cl | -0.86425800 | 1.38347800  | -0.10407800 |
|       | H  | 1.18260900  | 1.48141200  | 2.40832800  |
|       | S  | 1.11104000  | 0.39984400  | 3.19555900  |
| preM1 | C  | -0.06705800 | -0.05411600 | -0.05315500 |
|       | H  | -0.99399100 | 0.43241000  | 0.24218600  |
|       | H  | 0.68674700  | 0.14257700  | 0.71331900  |
|       | H  | 0.26531300  | 0.38740500  | -0.99781700 |
|       | O  | -0.34768600 | -1.43360100 | -0.18067500 |
|       | H  | 0.45005600  | -1.88772500 | -0.45955300 |
|       | C  | -0.63775800 | -1.11392300 | -3.17754200 |
|       | Cl | 0.36553000  | -0.14524700 | -4.17337400 |
|       | Cl | -2.21002700 | -0.53200900 | -2.86741500 |
|       | Cl | -0.44225900 | -2.80730800 | -3.30550900 |
| preM2 | C  | 0.06518700  | -0.12190800 | -0.10436300 |
|       | H  | 0.37406800  | -0.58937900 | 0.82898500  |
|       | H  | 0.96020200  | 0.18981500  | -0.64893000 |
|       | H  | -0.46912200 | -0.86908400 | -0.69891700 |



|        |    |             |             |             |
|--------|----|-------------|-------------|-------------|
|        | O  | -0.75711100 | 0.97615000  | 0.23606300  |
|        | H  | -1.12534200 | 1.34742500  | -0.56787500 |
|        | C  | -2.62952000 | -1.24165500 | 1.11755300  |
|        | Cl | -3.56712300 | -0.77909700 | -0.23749700 |
|        | Cl | -2.86292900 | -0.37093500 | 2.56193700  |
|        | Cl | -2.25792900 | -2.90702500 | 1.25864000  |
| preMT1 | C  | -0.04847400 | -0.03901200 | 0.10011500  |
|        | H  | 0.04376000  | -0.26973000 | 1.15822000  |
|        | H  | 0.91640900  | 0.28519900  | -0.27805000 |
|        | H  | -0.78714100 | 0.74846000  | -0.02384400 |
|        | H  | -0.71281700 | -1.06591800 | -1.94158200 |
|        | C  | -3.45669600 | 0.04694100  | -0.90503300 |
|        | Cl | -2.96079300 | 1.29102400  | -1.97477000 |
|        | Cl | -3.69504100 | 0.48601700  | 0.72937600  |
|        | Cl | -4.47881900 | -1.15908900 | -1.54583900 |
|        | S  | -0.58611700 | -1.57341200 | -0.70804500 |
| preMT2 | C  | -0.01814900 | 0.05889100  | 0.30337900  |
|        | H  | 0.54762200  | 0.60915900  | 1.05101400  |
|        | H  | 0.62971000  | -0.68606500 | -0.15138800 |
|        | H  | -0.86524900 | -0.42127500 | 0.78651800  |
|        | H  | -1.25875200 | 0.44553800  | -1.69596300 |
|        | C  | -1.38053000 | -2.36881300 | -1.34186100 |
|        | Cl | -0.57430700 | -2.26568900 | -2.84427800 |
|        | Cl | -3.03374000 | -1.93746300 | -1.31074900 |
|        | Cl | -0.87723700 | -3.59986700 | -0.27028800 |
|        | S  | -0.56720200 | 1.28686100  | -0.91608500 |
| postW  | C  | 0.25903600  | 0.06676300  | 0.09702300  |
|        | H  | 0.76755700  | -0.05720500 | 1.04192000  |
|        | Cl | 1.37467800  | -0.29950700 | -1.21489200 |
|        | Cl | -1.12155600 | -1.04107800 | 0.08216600  |
|        | Cl | -0.29432000 | 1.74487100  | 0.01012200  |
|        | O  | -0.62919800 | 0.86912500  | 2.83033000  |
|        | H  | -1.51236500 | 0.65599600  | 2.48222700  |
| postHS | C  | -0.00074500 | -0.06659000 | 0.03017900  |
|        | H  | -0.00891100 | -0.29031800 | 1.08826500  |
|        | Cl | 1.68662500  | 0.05292600  | -0.48147700 |
|        | Cl | -0.83420800 | -1.35704000 | -0.83170300 |
|        | Cl | -0.83060300 | 1.48078500  | -0.19226200 |
|        | H  | 1.66385400  | 2.09583800  | 1.84617700  |
|        | S  | 0.69366000  | 1.97327800  | 2.76709100  |
| postM1 | C  | 0.09685900  | 0.11087300  | -0.17807000 |
|        | O  | 0.18550000  | 0.31519700  | 1.17201100  |
|        | H  | 1.03600200  | -0.39790600 | -0.45406300 |
|        | H  | 0.07656000  | 1.04981900  | -0.74077400 |
|        | H  | -0.72985000 | -0.55111000 | -0.45071100 |
|        | C  | 1.55917500  | 2.99979200  | 1.53620700  |
|        | Cl | 2.31555800  | 4.18668300  | 2.59885900  |
|        | Cl | 2.71061200  | 2.41188900  | 0.32823500  |
|        | Cl | 0.12561400  | 3.67481400  | 0.75300100  |

|         |    |             |             |             |
|---------|----|-------------|-------------|-------------|
|         | H  | 1.23963600  | 2.15007100  | 2.12023400  |
| postM2  | C  | 0.27391400  | 0.15985800  | -0.04030400 |
|         | H  | 1.23925800  | 0.08064700  | 0.43230200  |
|         | H  | 0.15243100  | -0.04627800 | -1.09417000 |
|         | H  | -1.44940500 | -1.29598600 | 1.03866500  |
|         | O  | -0.55076900 | 1.06416300  | 0.54832100  |
|         | H  | -1.35073800 | 1.16593000  | 0.02280400  |
|         | C  | -2.52527400 | -1.39269800 | 0.96383900  |
|         | Cl | -2.99143300 | -0.78949400 | -0.64255800 |
|         | Cl | -3.26518100 | -0.41708400 | 2.22951600  |
|         | Cl | -2.95430600 | -3.09327900 | 1.12981200  |
| postMT1 | C  | -0.04235400 | -0.08975900 | 0.04451600  |
|         | H  | 0.06906500  | 0.13224000  | 1.10442000  |
|         | H  | 0.94643600  | 0.00165100  | -0.41030700 |
|         | H  | -0.42272900 | -1.09558200 | -0.10580500 |
|         | C  | 1.53043700  | 3.42755700  | -0.49024700 |
|         | Cl | 2.19261300  | 5.05821500  | -0.58987400 |
|         | Cl | 2.05260000  | 2.62126200  | 0.99346800  |
|         | Cl | 1.98195700  | 2.47463000  | -1.91088700 |
|         | H  | 0.45104200  | 3.48357700  | -0.46603600 |
|         | S  | -1.09114800 | 1.14256100  | -0.72918400 |
| postMT2 | C  | 0.10722800  | 0.24556900  | -0.05277600 |
|         | H  | 0.22891600  | 0.55205900  | 0.97281400  |
|         | H  | 0.96512500  | -0.00824600 | -0.65236000 |
|         | H  | -0.83676500 | -2.14213700 | -0.29211900 |
|         | H  | -1.14052300 | 0.13229000  | -2.00091900 |
|         | C  | -0.91493600 | -2.90906300 | -1.05238100 |
|         | Cl | 0.18496300  | -2.46038300 | -2.36812200 |
|         | Cl | -2.58242700 | -2.95422200 | -1.62509500 |
|         | Cl | -0.44197000 | -4.45273000 | -0.34415300 |
|         | S  | -1.38907000 | 0.66083600  | -0.79361200 |

**Table S4:** Relative Electronic Energies (in kcal/mol) at different levels of theory for the different species involved in the reaction of  $\text{CCl}_3$  with  $\text{H}_2\text{O}$  and  $\text{H}_2\text{S}$ .

| Reaction Pathway | System                            | M06-2X/cc-pVTZ | M06-2X/CBS <sup>a</sup> | MP2/cc-pVTZ | MP2/CBS <sup>b</sup> | CCSD(T) <sup>c</sup> | W1    |
|------------------|-----------------------------------|----------------|-------------------------|-------------|----------------------|----------------------|-------|
| X1               | $\text{CCl}_3+\text{H}_2\text{O}$ | 0              | 0                       | 0           | 0                    | 0                    | 0     |
|                  | PreW                              | -1.83          | -1.56                   | -1.24       | -1.29                | -1.70                | -0.80 |
|                  | TSW                               | 23.93          | 27.58                   | 29.28       | 33.26                | 25.88                | 27.60 |
|                  | PostW                             | 19.83          | 21.86                   | 22.58       | 25.45                | 19.48                | 24.26 |
|                  | $\text{CHCl}_3+\text{OH}$         | 23.69          | 25.56                   | 25.44       | 28.24                | 22.42                | 25.98 |
|                  |                                   |                |                         |             |                      |                      |       |
| X2               | $\text{CCl}_3+\text{H}_2\text{S}$ | 0              | 0                       | 0           | 0                    | 0                    | 0     |
|                  | PreHS                             | -1.13          | -1.52                   | -1.21       | -1.81                | -1.05                | -0.14 |
|                  | TSHS                              | 5.82           | 7.35                    | 5.97        | 6.58                 | 8.09                 | 7.84  |
|                  | PostHS                            | -6.14          | -7.11                   | -7.56       | -8.21                | -8.59                | -3.62 |
|                  | $\text{CHCl}_3+\text{SH}$         | -3.21          | -3.83                   | -5.12       | -5.20                | -6.53                | -1.58 |

<sup>a</sup>Including the ZPE correction as estimated at the UM062X/cc-pVTZ level.

<sup>b</sup>Including the zero-point energy (ZPE) correction as estimated at the UMP2/cc-pVTZ level.

<sup>c</sup>CalculationsUCCSD(T)/cc-pVTZ//UM062X/cc-pVTZ.

**Table S5:** Relative Electronic Energies (in kcal/mol) at different levels of theory for the different species involved in the reaction of  $\text{CCl}_3$  with  $\text{CH}_3\text{OH}$ .

| Reaction Pathway | System                                 | M06-2X/cc-pVTZ | M06-2X/CBS <sup>a</sup> | MP2/cc-pVTZ | MP2/CBS <sup>b</sup> | CCSD(T) <sup>c</sup> | W1    |
|------------------|----------------------------------------|----------------|-------------------------|-------------|----------------------|----------------------|-------|
| X3               | $\text{CCl}_3 + \text{CH}_3\text{OH}$  | 0              | 0                       | 0           | 0                    | 0                    | 0     |
|                  | PreM1                                  | -2.49          | -2.28                   | -2.05       | -2.18                | -2.27                | -1.26 |
|                  | TSM1                                   | 13.17          | 17.28                   | 19.37       | 23.19                | 17.46                | 16.76 |
|                  | PostM1                                 | 5.58           | 8.04                    | 10.13       | 12.72                | 6.52                 | 8.82  |
|                  | $\text{CHCl}_3 + \text{CH}_3\text{O}$  | 9.87           | 12.14                   | 14.02       | 16.75                | 10.81                | 11.91 |
| Y1               | $\text{CCl}_3 + \text{CH}_3\text{OH}$  | 0              | 0                       | 0           | 0                    | 0                    | 0     |
|                  | PreM2                                  | -2.67          | -2.54                   | -2.19       | -2.25                | -2.48                | -1.32 |
|                  | TSM2                                   | 10.50          | 13.55                   | 11.03       | 13.18                | 14.26                | 13.04 |
|                  | PostM2                                 | -2.62          | -1.42                   | -2.99       | -2.43                | -1.79                | -0.46 |
|                  | $\text{CHCl}_3 + \text{CH}_2\text{OH}$ | 2.07           | 3.34                    | 0.93        | 1.91                 | 2.50                 | 2.87  |

<sup>a</sup>Including the ZPE correction as estimated at the UM062X/cc-pVTZ level.

<sup>b</sup>Including the zero-point energy (ZPE) correction as estimated at the UMP2/cc-pVTZ level.

<sup>c</sup>Calculations UCCSD(T)/cc-pVTZ//UM062X/cc-pVTZ.

**Table S6:** Relative Electronic Energies (in kcal/mol) at different levels of theory for the different species involved in the reaction of CCl<sub>3</sub> with CH<sub>3</sub>SH.

| Reaction Pathway | System                                | M06-2X/cc-pVTZ | M06-2X/CBS <sup>a</sup> | MP2/cc-pVTZ | MP2/CBS <sup>b</sup> | CCSD(T) <sup>c</sup> | W1    |
|------------------|---------------------------------------|----------------|-------------------------|-------------|----------------------|----------------------|-------|
| X4               | CCl <sub>3</sub> +CH <sub>3</sub> SH  | 0              | 0                       | 0           | 0                    | 0                    | 0     |
|                  | PreMT1                                | -2.60          | -2.72                   | -2.28       | -2.90                | -1.91                | -1.61 |
|                  | TSMT1                                 | 3.22           | 5.13                    | 3.08        | 4.00                 | 5.89                 | 5.19  |
|                  | PostMT1                               | -11.66         | -12.05                  | -12.75      | -13.25               | -13.15               | -9.09 |
|                  | CHCl <sub>3</sub> +CH <sub>3</sub> S  | -8.03          | -7.99                   | -9.11       | -4.42                | -9.80                | -6.21 |
| Y2               | CCl <sub>3</sub> +CH <sub>3</sub> SH  | 0              | 0                       | 0           | 0                    | 0                    | 0     |
|                  | PreMT2                                | -2.07          | -2.39                   | -2.20       | -2.70                | -1.80                | -0.23 |
|                  | TSMT2                                 | 10.84          | 13.60                   | 10.83       | 12.43                | 14.62                | 12.66 |
|                  | PostMT2                               | -1.61          | -1.05                   | -2.26       | -2.69                | -1.12                | -0.81 |
|                  | CHCl <sub>3</sub> +CH <sub>2</sub> SH | 2.01           | 2.92                    | 1.04        | 1.52                 | 2.45                 | 1.39  |

<sup>a</sup>Including the ZPE correction as estimated at the UM062X/cc-pVTZ level.  
<sup>b</sup>Including the zero-point energy (ZPE) correction as estimated at the UMP2/cc-pVTZ level.  
<sup>c</sup>Calculations UCCSD(T)/cc-pVTZ//UM062X/cc-pVTZ.

**Table S7.** Reaction Gibbs Free energy ( $\Delta G_{r,298.15}^{\theta}$ ) and Reaction enthalpy ( $\Delta H_{r,298.15}^{\theta}$ ) for all reaction channels at the W1 levels (kcal/mol) with the ZPE corrections.

| Reaction Channel | Reaction System                                                                | $\Delta G_{r,298.15}^{\theta}$ | $\Delta H_{r,298.15}^{\theta}$  |                        |
|------------------|--------------------------------------------------------------------------------|--------------------------------|---------------------------------|------------------------|
|                  |                                                                                |                                | Calculated value (in this work) | Literature value [1-8] |
| X1               | H <sub>2</sub> O + CCl <sub>3</sub> → CHCl <sub>3</sub> + OH                   | 27.24                          | 25.68                           | 25.18                  |
| X2               | H <sub>2</sub> S + CCl <sub>3</sub> → CHCl <sub>3</sub> + SH                   | -0.11                          | -1.90                           | -3.05                  |
| X3               | CH <sub>3</sub> OH + CCl <sub>3</sub> → CHCl <sub>3</sub> + CH <sub>3</sub> O  | 12.20                          | 11.71                           | 11.52                  |
| Y1               | CH <sub>3</sub> OH + CCl <sub>3</sub> → CHCl <sub>3</sub> + CH <sub>2</sub> OH | 13.13                          | 2.87                            | 2.44                   |
| X4               | CH <sub>3</sub> SH + CCl <sub>3</sub> → CHCl <sub>3</sub> + CH <sub>3</sub> S  | -5.83                          | -6.48                           | -5.04                  |
| Y2               | CH <sub>3</sub> SH + CCl <sub>3</sub> → CHCl <sub>3</sub> + CH <sub>2</sub> SH | 1.11                           | 1.71                            | 1.47                   |

**Table S8:** Reaction Energies (Electronic) ( $\Delta E$ ) and Forward ( $\Delta E_{\text{fwd}}$ ) and Reverse ( $\Delta E_{\text{rev}}$ ) Barriers (kcal/mol) for the Reaction  $\text{H}_2\text{O} + \text{CCl}_3 \rightarrow \text{CHCl}_3 + \text{OH}$ .

| Level of theory         | $\Delta E_{\text{fwd}}$ | $\Delta E$ | $\Delta E_{\text{rev}}$ |
|-------------------------|-------------------------|------------|-------------------------|
| M06-2X/cc-pVTZ          | 23.93                   | 23.69      | 0.24                    |
| M06-2X/CBS <sup>b</sup> | 27.58                   | 25.56      | 2.02                    |
| MP2/cc-pVTZ             | 29.28                   | 25.44      | 3.84                    |
| MP2/CBS <sup>a</sup>    | 33.26                   | 28.24      | 5.02                    |
| CCSD(T) <sup>c</sup>    | 25.88                   | 22.42      | 3.46                    |
| W1                      | 27.60                   | 25.98      | 1.62                    |

<sup>a</sup>Including the zero-point energy (ZPE) correction as estimated at the UMP2/cc-pVTZ level.

<sup>b</sup>Including the ZPE correction as estimated at the UM062X/cc-pVTZ level.

<sup>c</sup>Calculations UCCSD(T)/cc-pVTZ//UM062X/cc-pVTZ.

**Table S9:** Reaction Energies (Electronic) ( $\Delta E$ ) and Forward ( $\Delta E_{\text{fwd}}$ ) and Reverse ( $\Delta E_{\text{rev}}$ ) Barriers (kcal/mol) for the Reaction  $\text{H}_2\text{S} + \text{CCl}_3 \rightarrow \text{CHCl}_3 + \text{SH}$ .

| Level of theory         | $\Delta E_{\text{fwd}}$ | $\Delta E$ | $\Delta E_{\text{rev}}$ |
|-------------------------|-------------------------|------------|-------------------------|
| M06-2X/cc-pVTZ          | 5.82                    | -3.21      | 9.03                    |
| M06-2X/CBS <sup>b</sup> | 7.35                    | -3.83      | 11.18                   |
| MP2/cc-pVTZ             | 5.97                    | -5.12      | 11.09                   |
| MP2/CBS <sup>a</sup>    | 6.58                    | -5.20      | 11.78                   |
| CCSD(T) <sup>c</sup>    | 8.09                    | -6.53      | 14.62                   |
| W1                      | 7.84                    | -1.58      | 9.42                    |

**Table S10:** Reaction Energies (Electronic) ( $\Delta E$ ) and Forward ( $\Delta E_{\text{fwd}}$ ) and Reverse ( $\Delta E_{\text{rev}}$ ) Barriers (kcal/mol) for the Reaction  $\text{CH}_3\text{OH} + \text{CCl}_3 \rightarrow \text{CHCl}_3 + \text{CH}_3\text{O}$ .

| Level of theory         | $\Delta E_{\text{fwd}}$ | $\Delta E$ | $\Delta E_{\text{rev}}$ |
|-------------------------|-------------------------|------------|-------------------------|
| M06-2X/cc-pVTZ          | 13.17                   | 9.87       | 3.3                     |
| M06-2X/CBS <sup>b</sup> | 17.28                   | 12.14      | 5.14                    |
| MP2/cc-pVTZ             | 19.37                   | 14.02      | 5.35                    |
| MP2/CBS <sup>a</sup>    | 23.19                   | 16.75      | 6.44                    |
| CCSD(T) <sup>c</sup>    | 17.46                   | 10.81      | 6.65                    |
| W1                      | 16.76                   | 11.91      | 4.85                    |

**Table S11:** Reaction Energies (Electronic) ( $\Delta E$ ) and Forward ( $\Delta E_{\text{fwd}}$ ) and Reverse ( $\Delta E_{\text{rev}}$ ) Barriers (kcal/mol) for the Reaction  $\text{CH}_3\text{OH} + \text{CCl}_3 \rightarrow \text{CHCl}_3 + \text{CH}_2\text{OH}$ .

| Level of theory         | $\Delta E_{\text{fwd}}$ | $\Delta E$ | $\Delta E_{\text{rev}}$ |
|-------------------------|-------------------------|------------|-------------------------|
| M06-2X/cc-pVTZ          | 10.50                   | 2.07       | 8.43                    |
| M06-2X/CBS <sup>b</sup> | 13.55                   | 3.34       | 10.21                   |
| MP2/cc-pVTZ             | 11.03                   | 0.93       | 10.10                   |
| MP2/CBS <sup>a</sup>    | 13.18                   | 1.91       | 11.27                   |
| CCSD(T) <sup>c</sup>    | 14.26                   | 2.50       | 11.76                   |
| W1                      | 13.04                   | 2.87       | 10.17                   |

**Table S12:** Reaction Energies (Electronic) ( $\Delta E$ ) and Forward ( $\Delta E_{\text{fwd}}$ ) and Reverse ( $\Delta E_{\text{rev}}$ ) Barriers (kcal/mol) for the Reaction  $\text{CH}_3\text{SH} + \text{CCl}_3 \rightarrow \text{CHCl}_3 + \text{CH}_3\text{S}$ .

| Level of theory         | $\Delta E_{\text{fwd}}$ | $\Delta E$ | $\Delta E_{\text{rev}}$ |
|-------------------------|-------------------------|------------|-------------------------|
| M06-2X/cc-pVTZ          | 3.22                    | -8.03      | 11.25                   |
| M06-2X/CBS <sup>b</sup> | 5.13                    | -7.99      | 13.12                   |
| MP2/cc-pVTZ             | 3.08                    | -9.11      | 12.19                   |
| MP2/CBS <sup>a</sup>    | 4.00                    | -4.42      | 8.42                    |
| CCSD(T) <sup>c</sup>    | 5.89                    | -9.80      | 15.69                   |
| W1                      | 5.19                    | -6.21      | 11.40                   |

**Table S13:** Reaction Energies (Electronic) ( $\Delta E$ ) and Forward ( $\Delta E_{\text{fwd}}$ ) and Reverse ( $\Delta E_{\text{rev}}$ ) Barriers (kcal/mol) for the Reaction  $\text{CH}_3\text{SH} + \text{CCl}_3 \rightarrow \text{CHCl}_3 + \text{CH}_2\text{SH}$ .

| Level of theory         | $\Delta E_{\text{fwd}}$ | $\Delta E$ | $\Delta E_{\text{rev}}$ |
|-------------------------|-------------------------|------------|-------------------------|
| M06-2X/cc-pVTZ          | 10.84                   | 2.01       | 8.83                    |
| M06-2X/CBS <sup>b</sup> | 13.60                   | 2.92       | 10.68                   |
| MP2/cc-pVTZ             | 10.83                   | 1.04       | 9.79                    |
| MP2/CBS <sup>a</sup>    | 12.43                   | 1.52       | 10.91                   |
| CCSD(T) <sup>c</sup>    | 14.62                   | 2.45       | 12.17                   |
| W1                      | 12.66                   | 1.39       | 11.27                   |

**Table S14:** Calculated Rate Coefficients (TST/ZCT) ( $\text{cm}^3 \text{molecule}^{-1}\text{s}^{-1}$ ) at W1 and CCSD(T) method for the  $\text{CCl}_3+\text{H}_2\text{X}$  Reaction at 1atm Pressure.

|      | Rate Coefficient, k ( $\text{cm}^3 \text{molecule}^{-1}\text{s}^{-1}$ ) |                 | Rate Coefficient, k ( $\text{cm}^3 \text{molecule}^{-1}\text{s}^{-1}$ ) |                 |
|------|-------------------------------------------------------------------------|-----------------|-------------------------------------------------------------------------|-----------------|
|      | W1                                                                      |                 | CCSD(T)                                                                 |                 |
| T(K) | $k_{x1}$ (HO-H)                                                         | $k_{x2}$ (HS-H) | $k_{x1}$ (HO-H)                                                         | $k_{x2}$ (HS-H) |
| 200  | 9.71E-43                                                                | 5.78E-20        | 7.21E-41                                                                | 5.97E-20        |
| 225  | 1.88E-39                                                                | 1.98E-19        | 8.60E-38                                                                | 1.71E-19        |
| 250  | 8.10E-37                                                                | 5.96E-19        | 2.52E-35                                                                | 4.65E-19        |
| 275  | 1.18E-34                                                                | 1.59E-18        | 2.67E-33                                                                | 1.17E-18        |
| 298  | 5.53E-33                                                                | 3.59E-18        | 9.84E-32                                                                | 2.57E-18        |
| 300  | 7.52E-33                                                                | 3.83E-18        | 1.31E-31                                                                | 2.74E-18        |
| 325  | 2.57E-31                                                                | 8.41E-18        | 3.58E-30                                                                | 5.91E-18        |
| 350  | 5.34E-30                                                                | 1.70E-17        | 6.16E-29                                                                | 1.19E-17        |
| 375  | 7.48E-29                                                                | 3.22E-17        | 7.31E-28                                                                | 2.24E-17        |
| 400  | 7.60E-28                                                                | 5.74E-17        | 6.43E-27                                                                | 4.01E-17        |
| 450  | 3.70E-26                                                                | 1.58E-16        | 2.46E-25                                                                | 1.11E-16        |
| 500  | 8.50E-25                                                                | 3.73E-16        | 4.66E-24                                                                | 2.65E-16        |
| 550  | 1.13E-23                                                                | 7.83E-16        | 5.29E-23                                                                | 5.62E-16        |
| 600  | 9.96E-23                                                                | 1.50E-15        | 4.09E-22                                                                | 1.09E-15        |
| 650  | 6.39E-22                                                                | 2.67E-15        | 2.35E-21                                                                | 1.95E-15        |
| 700  | 3.20E-21                                                                | 4.47E-15        | 1.07E-20                                                                | 3.30E-15        |
| 750  | 1.31E-20                                                                | 7.11E-15        | 4.02E-20                                                                | 5.30E-15        |
| 800  | 4.55E-20                                                                | 1.09E-14        | 1.30E-19                                                                | 8.15E-15        |
| 850  | 1.38E-19                                                                | 1.60E-14        | 3.71E-19                                                                | 1.21E-14        |
| 900  | 3.75E-19                                                                | 2.29E-14        | 9.50E-19                                                                | 1.74E-14        |
| 950  | 9.23E-19                                                                | 3.18E-14        | 2.23E-18                                                                | 2.43E-14        |
| 1000 | 2.10E-18                                                                | 4.33E-14        | 4.83E-18                                                                | 3.32E-14        |
| 1050 | 4.44E-18                                                                | 5.77E-14        | 9.82E-18                                                                | 4.45E-14        |



|      |          |          |          |          |
|------|----------|----------|----------|----------|
| 1100 | 8.85E-18 | 7.54E-14 | 1.88E-17 | 5.84E-14 |
| 1150 | 1.67E-17 | 9.71E-14 | 3.44E-17 | 7.55E-14 |
| 1200 | 3.01E-17 | 1.23E-13 | 6.01E-17 | 9.61E-14 |
| 1250 | 5.21E-17 | 1.54E-13 | 1.01E-16 | 1.21E-13 |
| 1300 | 8.68E-17 | 1.91E-13 | 1.64E-16 | 1.50E-13 |
| 1350 | 1.40E-16 | 2.33E-13 | 2.58E-16 | 1.84E-13 |
| 1400 | 2.19E-16 | 2.83E-13 | 3.94E-16 | 2.24E-13 |
| 1450 | 3.34E-16 | 3.40E-13 | 5.88E-16 | 2.69E-13 |
| 1500 | 4.97E-16 | 4.05E-13 | 8.57E-16 | 3.21E-13 |
| 1550 | 7.23E-16 | 4.78E-13 | 1.22E-15 | 3.81E-13 |
| 1600 | 1.03E-15 | 5.61E-13 | 1.72E-15 | 4.48E-13 |
| 1650 | 1.44E-15 | 6.55E-13 | 2.36E-15 | 5.24E-13 |
| 1700 | 1.99E-15 | 7.59E-13 | 3.21E-15 | 6.08E-13 |
| 1750 | 2.69E-15 | 8.75E-13 | 4.28E-15 | 7.02E-13 |
| 1800 | 3.60E-15 | 1.00E-12 | 5.65E-15 | 8.07E-13 |
| 1850 | 4.75E-15 | 1.14E-12 | 7.35E-15 | 9.22E-13 |
| 1900 | 6.19E-15 | 1.30E-12 | 9.47E-15 | 1.05E-12 |
| 1950 | 7.98E-15 | 1.47E-12 | 1.21E-14 | 1.19E-12 |
| 2000 | 1.02E-14 | 1.66E-12 | 1.52E-14 | 1.34E-12 |

**Table S15:** Calculated Rate Coefficients (TST/ZCT) ( $\text{cm}^3\text{molecule}^{-1}\text{s}^{-1}$ ) at a W1 method for the  $\text{CCl}_3+\text{CH}_3\text{OH}$  Reaction at 1atm Pressure.

| T(K) | Rate Coefficient, k ( $\text{cm}^3\text{ molecule}^{-1}\text{ s}^{-1}$ ) |                |                           | Branching ratio, $\phi$ (%)                                   |                                          |
|------|--------------------------------------------------------------------------|----------------|---------------------------|---------------------------------------------------------------|------------------------------------------|
|      | $k_{X3}$ (O-H)                                                           | $k_{Y1}$ (C-H) | $k_{OV1}(=k_{X3}+k_{Y1})$ | X3 ( $\text{CH}_3\text{O} + \text{P}$ )<br>P= $\text{CHCl}_3$ | Y1 ( $\text{CH}_2\text{OH} + \text{P}$ ) |
| 200  | 4.61E-28                                                                 | 2.46E-23       | 2.46E-23                  | 0.00                                                          | 100.00                                   |
| 225  | 1.38E-26                                                                 | 1.20E-22       | 1.20E-22                  | 0.01                                                          | 99.99                                    |
| 250  | 2.23E-25                                                                 | 5.16E-22       | 5.16E-22                  | 0.04                                                          | 99.96                                    |

|      |          |          |          |       |       |
|------|----------|----------|----------|-------|-------|
| 275  | 2.29E-24 | 1.97E-21 | 1.97E-21 | 0.12  | 99.88 |
| 298  | 1.43E-23 | 6.09E-21 | 6.10E-21 | 0.23  | 99.77 |
| 300  | 1.66E-23 | 6.69E-21 | 6.71E-21 | 0.25  | 99.75 |
| 325  | 9.18E-23 | 2.04E-20 | 2.05E-20 | 0.45  | 99.55 |
| 350  | 4.08E-22 | 5.62E-20 | 5.66E-20 | 0.72  | 99.28 |
| 375  | 1.52E-21 | 1.41E-19 | 1.43E-19 | 1.07  | 98.93 |
| 400  | 4.90E-21 | 3.28E-19 | 3.33E-19 | 1.47  | 98.53 |
| 450  | 3.61E-20 | 1.44E-18 | 1.48E-18 | 2.45  | 97.55 |
| 500  | 1.87E-19 | 5.03E-18 | 5.22E-18 | 3.58  | 96.42 |
| 550  | 7.48E-19 | 1.48E-17 | 1.55E-17 | 4.81  | 95.19 |
| 600  | 2.45E-18 | 3.78E-17 | 4.03E-17 | 6.09  | 93.91 |
| 650  | 6.86E-18 | 8.63E-17 | 9.32E-17 | 7.36  | 92.64 |
| 700  | 1.70E-17 | 1.80E-16 | 1.97E-16 | 8.63  | 91.37 |
| 750  | 3.79E-17 | 3.48E-16 | 3.86E-16 | 9.82  | 90.18 |
| 800  | 7.80E-17 | 6.30E-16 | 7.08E-16 | 11.02 | 88.98 |
| 850  | 1.50E-16 | 1.08E-15 | 1.23E-15 | 12.20 | 87.80 |
| 900  | 2.70E-16 | 1.77E-15 | 2.04E-15 | 13.24 | 86.76 |
| 950  | 4.64E-16 | 2.80E-15 | 3.26E-15 | 14.22 | 85.78 |
| 1000 | 7.63E-16 | 4.26E-15 | 5.02E-15 | 15.19 | 84.81 |
| 1050 | 1.21E-15 | 6.29E-15 | 7.50E-15 | 16.13 | 83.87 |
| 1100 | 1.85E-15 | 9.04E-15 | 1.09E-14 | 16.99 | 83.01 |
| 1150 | 2.75E-15 | 1.27E-14 | 1.55E-14 | 17.80 | 82.20 |
| 1200 | 3.98E-15 | 1.74E-14 | 2.14E-14 | 18.62 | 81.38 |
| 1250 | 5.63E-15 | 2.35E-14 | 2.91E-14 | 19.33 | 80.67 |
| 1300 | 7.81E-15 | 3.12E-14 | 3.90E-14 | 20.02 | 79.98 |
| 1350 | 1.06E-14 | 4.07E-14 | 5.13E-14 | 20.66 | 79.34 |
| 1400 | 1.42E-14 | 5.23E-14 | 6.65E-14 | 21.35 | 78.65 |

|      |          |          |          |       |       |
|------|----------|----------|----------|-------|-------|
| 1450 | 1.87E-14 | 6.65E-14 | 8.52E-14 | 21.95 | 78.05 |
| 1500 | 2.43E-14 | 8.34E-14 | 1.08E-13 | 22.56 | 77.44 |
| 1550 | 3.11E-14 | 1.04E-13 | 1.35E-13 | 23.02 | 76.98 |
| 1600 | 3.94E-14 | 1.27E-13 | 1.66E-13 | 23.68 | 76.32 |
| 1650 | 4.94E-14 | 1.55E-13 | 2.04E-13 | 24.17 | 75.83 |
| 1700 | 6.12E-14 | 1.87E-13 | 2.48E-13 | 24.66 | 75.34 |
| 1750 | 7.53E-14 | 2.25E-13 | 3.00E-13 | 25.07 | 74.93 |
| 1800 | 9.17E-14 | 2.67E-13 | 3.59E-13 | 25.56 | 74.44 |
| 1850 | 1.11E-13 | 3.16E-13 | 4.27E-13 | 26.00 | 74.00 |
| 1900 | 1.33E-13 | 3.71E-13 | 5.04E-13 | 26.39 | 73.61 |
| 1950 | 1.58E-13 | 4.33E-13 | 5.91E-13 | 26.73 | 73.27 |
| 2000 | 1.87E-13 | 5.03E-13 | 6.90E-13 | 27.10 | 72.90 |

**Table S16:** Calculated Rate Coefficients (TST/ZCT) ( $\text{cm}^3\text{molecule}^{-1}\text{s}^{-1}$ ) at a W1 method for the  $\text{CCl}_3+\text{CH}_3\text{SH}$  Reaction at 1atm Pressure.

| T(K) | Rate Coefficient, k ( $\text{cm}^3\text{ molecule}^{-1}\text{ s}^{-1}$ ) |                             |                                                   | Branching ratio, $\phi$ (%)                                   |                                          |
|------|--------------------------------------------------------------------------|-----------------------------|---------------------------------------------------|---------------------------------------------------------------|------------------------------------------|
|      | $k_{\text{X4}}(\text{S-H})$                                              | $k_{\text{Y2}}(\text{C-H})$ | $k_{\text{OV2}}(= k_{\text{X4}} + k_{\text{Y2}})$ | X3 ( $\text{CH}_3\text{S} + \text{P}$ )<br>P= $\text{CHCl}_3$ | Y1 ( $\text{CH}_2\text{SH} + \text{P}$ ) |
| 200  | 1.71E-17                                                                 | 1.44E-22                    | 1.71E-17                                          | 100.00                                                        | 0.00                                     |
| 225  | 3.47E-17                                                                 | 5.05E-22                    | 3.47E-17                                          | 100.00                                                        | 0.00                                     |
| 250  | 6.61E-17                                                                 | 1.70E-21                    | 6.61E-17                                          | 100.00                                                        | 0.00                                     |
| 275  | 1.19E-16                                                                 | 5.38E-21                    | 1.19E-16                                          | 100.00                                                        | 0.00                                     |
| 298  | 1.94E-16                                                                 | 1.46E-20                    | 1.94E-16                                          | 99.99                                                         | 0.01                                     |
| 300  | 2.02E-16                                                                 | 1.59E-20                    | 2.02E-16                                          | 99.99                                                         | 0.01                                     |
| 325  | 3.27E-16                                                                 | 4.35E-20                    | 3.27E-16                                          | 99.99                                                         | 0.01                                     |
| 350  | 5.08E-16                                                                 | 1.10E-19                    | 5.08E-16                                          | 99.98                                                         | 0.02                                     |
| 375  | 7.61E-16                                                                 | 2.58E-19                    | 7.61E-16                                          | 99.97                                                         | 0.03                                     |

|      |          |          |          |       |       |
|------|----------|----------|----------|-------|-------|
| 400  | 1.10E-15 | 5.66E-19 | 1.10E-15 | 99.95 | 0.05  |
| 450  | 2.15E-15 | 2.27E-18 | 2.15E-15 | 99.89 | 0.11  |
| 500  | 3.83E-15 | 7.43E-18 | 3.84E-15 | 99.81 | 0.19  |
| 550  | 6.38E-15 | 2.07E-17 | 6.40E-15 | 99.68 | 0.32  |
| 600  | 1.01E-14 | 5.07E-17 | 1.02E-14 | 99.50 | 0.50  |
| 650  | 1.52E-14 | 1.12E-16 | 1.53E-14 | 99.27 | 0.73  |
| 700  | 2.20E-14 | 2.26E-16 | 2.22E-14 | 98.98 | 1.02  |
| 750  | 3.10E-14 | 4.26E-16 | 3.14E-14 | 98.64 | 1.36  |
| 800  | 4.26E-14 | 7.55E-16 | 4.34E-14 | 98.26 | 1.74  |
| 850  | 5.70E-14 | 1.27E-15 | 5.83E-14 | 97.82 | 2.18  |
| 900  | 7.48E-14 | 2.05E-15 | 7.69E-14 | 97.33 | 2.67  |
| 950  | 9.65E-14 | 3.18E-15 | 9.97E-14 | 96.81 | 3.19  |
| 1000 | 1.22E-13 | 4.78E-15 | 1.27E-13 | 96.23 | 3.77  |
| 1050 | 1.53E-13 | 6.98E-15 | 1.60E-13 | 95.64 | 4.36  |
| 1100 | 1.89E-13 | 9.92E-15 | 1.99E-13 | 95.01 | 4.99  |
| 1150 | 2.31E-13 | 1.38E-14 | 2.45E-13 | 94.36 | 5.64  |
| 1200 | 2.80E-13 | 1.88E-14 | 2.99E-13 | 93.71 | 6.29  |
| 1250 | 3.36E-13 | 2.51E-14 | 3.61E-13 | 93.05 | 6.95  |
| 1300 | 3.99E-13 | 3.30E-14 | 4.32E-13 | 92.36 | 7.64  |
| 1350 | 4.70E-13 | 4.28E-14 | 5.13E-13 | 91.65 | 8.35  |
| 1400 | 5.50E-13 | 5.47E-14 | 6.05E-13 | 90.95 | 9.05  |
| 1450 | 6.40E-13 | 6.90E-14 | 7.09E-13 | 90.27 | 9.73  |
| 1500 | 7.39E-13 | 8.62E-14 | 8.25E-13 | 89.55 | 10.45 |
| 1550 | 8.49E-13 | 1.06E-13 | 9.55E-13 | 88.90 | 11.10 |
| 1600 | 9.71E-13 | 1.30E-13 | 1.10E-12 | 88.19 | 11.81 |
| 1650 | 1.10E-12 | 1.58E-13 | 1.26E-12 | 87.44 | 12.56 |
| 1700 | 1.25E-12 | 1.90E-13 | 1.44E-12 | 86.81 | 13.19 |

|      |          |          |          |       |       |
|------|----------|----------|----------|-------|-------|
| 1750 | 1.41E-12 | 2.27E-13 | 1.64E-12 | 86.13 | 13.87 |
| 1800 | 1.58E-12 | 2.69E-13 | 1.85E-12 | 85.45 | 14.55 |
| 1850 | 1.77E-12 | 3.17E-13 | 2.09E-12 | 84.81 | 15.19 |
| 1900 | 1.97E-12 | 3.71E-13 | 2.34E-12 | 84.15 | 15.85 |
| 1950 | 2.19E-12 | 4.31E-13 | 2.62E-12 | 83.56 | 16.44 |
| 2000 | 2.43E-12 | 4.99E-13 | 2.93E-12 | 82.96 | 17.04 |

**Table S17:** Calculated Rate Coefficients (TST/ZCT) ( $\text{cm}^3\text{molecule}^{-1}\text{s}^{-1}$ ) at CCSD(T) method for the  $\text{CCl}_3+\text{CH}_3\text{OH}$  Reaction at 1atm Pressure.

| T(K) | Rate Coefficient, k ( $\text{cm}^3\text{ molecule}^{-1}\text{ s}^{-1}$ ) |                      |                                      | Branching ratio, $\phi$ (%)                                   |                                          |
|------|--------------------------------------------------------------------------|----------------------|--------------------------------------|---------------------------------------------------------------|------------------------------------------|
|      | $k_{X3}(\text{O-H})$                                                     | $k_{Y1}(\text{C-H})$ | $k_{\text{OV1}} (= k_{X3} + k_{Y1})$ | X3 ( $\text{CH}_3\text{O} + \text{P}$ )<br>P= $\text{CHCl}_3$ | Y1 ( $\text{CH}_2\text{OH} + \text{P}$ ) |
| 200  | 2.62E-28                                                                 | 2.55E-24             | 2.55E-24                             | 0.01                                                          | 99.99                                    |
| 225  | 6.91E-27                                                                 | 1.32E-23             | 1.32E-23                             | 0.05                                                          | 99.95                                    |
| 250  | 1.05E-25                                                                 | 6.21E-23             | 6.22E-23                             | 0.17                                                          | 99.83                                    |
| 275  | 1.05E-24                                                                 | 2.62E-22             | 2.63E-22                             | 0.40                                                          | 99.60                                    |
| 298  | 6.53E-24                                                                 | 8.97E-22             | 9.04E-22                             | 0.72                                                          | 99.28                                    |
| 300  | 7.57E-24                                                                 | 9.94E-22             | 1.00E-21                             | 0.76                                                          | 99.24                                    |
| 325  | 4.22E-23                                                                 | 3.37E-21             | 3.41E-21                             | 1.24                                                          | 98.76                                    |
| 350  | 1.91E-22                                                                 | 1.03E-20             | 1.05E-20                             | 1.82                                                          | 98.18                                    |
| 375  | 7.28E-22                                                                 | 2.83E-20             | 2.90E-20                             | 2.51                                                          | 97.49                                    |
| 400  | 2.40E-21                                                                 | 7.16E-20             | 7.40E-20                             | 3.24                                                          | 96.76                                    |
| 450  | 1.86E-20                                                                 | 3.64E-19             | 3.83E-19                             | 4.86                                                          | 95.14                                    |
| 500  | 1.01E-19                                                                 | 1.44E-18             | 1.54E-18                             | 6.55                                                          | 93.45                                    |
| 550  | 4.20E-19                                                                 | 4.70E-18             | 5.12E-18                             | 8.20                                                          | 91.80                                    |
| 600  | 1.43E-18                                                                 | 1.31E-17             | 1.45E-17                             | 9.84                                                          | 90.16                                    |
| 650  | 4.13E-18                                                                 | 3.22E-17             | 3.63E-17                             | 11.37                                                         | 88.63                                    |

|      |          |          |          |       |       |
|------|----------|----------|----------|-------|-------|
| 700  | 1.05E-17 | 7.17E-17 | 8.22E-17 | 12.77 | 87.23 |
| 750  | 2.41E-17 | 1.46E-16 | 1.70E-16 | 14.17 | 85.83 |
| 800  | 5.07E-17 | 2.79E-16 | 3.30E-16 | 15.38 | 84.62 |
| 850  | 9.93E-17 | 5.00E-16 | 5.99E-16 | 16.57 | 83.43 |
| 900  | 1.83E-16 | 8.53E-16 | 1.04E-15 | 17.66 | 82.34 |
| 950  | 3.20E-16 | 1.39E-15 | 1.71E-15 | 18.71 | 81.29 |
| 1000 | 5.34E-16 | 2.19E-15 | 2.72E-15 | 19.60 | 80.40 |
| 1050 | 8.57E-16 | 3.32E-15 | 4.18E-15 | 20.52 | 79.48 |
| 1100 | 1.33E-15 | 4.91E-15 | 6.24E-15 | 21.31 | 78.69 |
| 1150 | 2.00E-15 | 7.05E-15 | 9.05E-15 | 22.10 | 77.90 |
| 1200 | 2.93E-15 | 9.90E-15 | 1.28E-14 | 22.84 | 77.16 |
| 1250 | 4.19E-15 | 1.36E-14 | 1.78E-14 | 23.55 | 76.45 |
| 1300 | 5.87E-15 | 1.84E-14 | 2.43E-14 | 24.19 | 75.81 |
| 1350 | 8.05E-15 | 2.44E-14 | 3.25E-14 | 24.81 | 75.19 |
| 1400 | 1.09E-14 | 3.19E-14 | 4.28E-14 | 25.47 | 74.53 |
| 1450 | 1.44E-14 | 4.12E-14 | 5.56E-14 | 25.90 | 74.10 |
| 1500 | 1.88E-14 | 5.24E-14 | 7.12E-14 | 26.40 | 73.60 |
| 1550 | 2.43E-14 | 6.59E-14 | 9.02E-14 | 26.94 | 73.06 |
| 1600 | 3.10E-14 | 8.20E-14 | 1.13E-13 | 27.43 | 72.57 |
| 1650 | 3.91E-14 | 1.01E-13 | 1.40E-13 | 27.91 | 72.09 |
| 1700 | 4.87E-14 | 1.23E-13 | 1.72E-13 | 28.36 | 71.64 |
| 1750 | 6.02E-14 | 1.49E-13 | 2.09E-13 | 28.78 | 71.22 |
| 1800 | 7.38E-14 | 1.80E-13 | 2.54E-13 | 29.08 | 70.92 |
| 1850 | 8.96E-14 | 2.14E-13 | 3.04E-13 | 29.51 | 70.49 |
| 1900 | 1.08E-13 | 2.54E-13 | 3.62E-13 | 29.83 | 70.17 |
| 1950 | 1.29E-13 | 2.99E-13 | 4.28E-13 | 30.14 | 69.86 |
| 2000 | 1.54E-13 | 3.49E-13 | 5.03E-13 | 30.62 | 69.38 |

**Table S18:** Calculated Rate Coefficients (TST/ZCT) ( $\text{cm}^3\text{molecule}^{-1}\text{s}^{-1}$ ) at CCSD(T) method for the  $\text{CCl}_3+\text{CH}_3\text{SH}$  Reaction at 1atm Pressure.

| T(K) | Rate Coefficient, k ( $\text{cm}^3\text{ molecule}^{-1}\text{ s}^{-1}$ ) |                |                              | Branching ratio, $\phi$ (%)                                   |                                          |
|------|--------------------------------------------------------------------------|----------------|------------------------------|---------------------------------------------------------------|------------------------------------------|
|      | $k_{X4}$ (S-H)                                                           | $k_{Y2}$ (C-H) | $k_{Ov2}(= k_{X4} + k_{Y2})$ | X3 ( $\text{CH}_3\text{S} + \text{P}$ )<br>P= $\text{CHCl}_3$ | Y1 ( $\text{CH}_2\text{SH} + \text{P}$ ) |
| 200  | 3.96E-18                                                                 | 2.23E-24       | 3.96E-18                     | 100.00                                                        | 0.00                                     |
| 225  | 8.84E-18                                                                 | 1.05E-23       | 8.84E-18                     | 100.00                                                        | 0.00                                     |
| 250  | 1.85E-17                                                                 | 4.59E-23       | 1.85E-17                     | 100.00                                                        | 0.00                                     |
| 275  | 3.60E-17                                                                 | 1.85E-22       | 3.60E-17                     | 100.00                                                        | 0.00                                     |
| 298  | 6.31E-17                                                                 | 6.16E-22       | 6.31E-17                     | 100.00                                                        | 0.00                                     |
| 300  | 6.60E-17                                                                 | 6.82E-22       | 6.60E-17                     | 100.00                                                        | 0.00                                     |
| 325  | 1.15E-16                                                                 | 2.28E-21       | 1.15E-16                     | 100.00                                                        | 0.00                                     |
| 350  | 1.89E-16                                                                 | 6.91E-21       | 1.89E-16                     | 100.00                                                        | 0.00                                     |
| 375  | 2.99E-16                                                                 | 1.91E-20       | 2.99E-16                     | 99.99                                                         | 0.01                                     |
| 400  | 4.56E-16                                                                 | 4.85E-20       | 4.56E-16                     | 99.99                                                         | 0.01                                     |
| 450  | 9.64E-16                                                                 | 2.50E-19       | 9.64E-16                     | 99.97                                                         | 0.03                                     |
| 500  | 1.84E-15                                                                 | 1.00E-18       | 1.84E-15                     | 99.95                                                         | 0.05                                     |
| 550  | 3.25E-15                                                                 | 3.32E-18       | 3.25E-15                     | 99.90                                                         | 0.10                                     |
| 600  | 5.38E-15                                                                 | 9.39E-18       | 5.39E-15                     | 99.83                                                         | 0.17                                     |
| 650  | 8.46E-15                                                                 | 2.34E-17       | 8.48E-15                     | 99.72                                                         | 0.28                                     |
| 700  | 1.27E-14                                                                 | 5.26E-17       | 1.28E-14                     | 99.59                                                         | 0.41                                     |
| 750  | 1.85E-14                                                                 | 1.09E-16       | 1.86E-14                     | 99.41                                                         | 0.59                                     |
| 800  | 2.61E-14                                                                 | 2.09E-16       | 2.63E-14                     | 99.21                                                         | 0.79                                     |
| 850  | 3.58E-14                                                                 | 3.77E-16       | 3.62E-14                     | 98.96                                                         | 1.04                                     |
| 900  | 4.80E-14                                                                 | 6.48E-16       | 4.86E-14                     | 98.67                                                         | 1.33                                     |
| 950  | 6.31E-14                                                                 | 1.06E-15       | 6.42E-14                     | 98.35                                                         | 1.65                                     |

|      |          |          |          |       |       |
|------|----------|----------|----------|-------|-------|
| 1000 | 8.15E-14 | 1.68E-15 | 8.32E-14 | 97.98 | 2.02  |
| 1050 | 1.04E-13 | 2.57E-15 | 1.07E-13 | 97.59 | 2.41  |
| 1100 | 1.30E-13 | 3.81E-15 | 1.34E-13 | 97.15 | 2.85  |
| 1150 | 1.61E-13 | 5.51E-15 | 1.67E-13 | 96.69 | 3.31  |
| 1200 | 1.97E-13 | 7.77E-15 | 2.05E-13 | 96.21 | 3.79  |
| 1250 | 2.39E-13 | 1.07E-14 | 2.50E-13 | 95.71 | 4.29  |
| 1300 | 2.87E-13 | 1.45E-14 | 3.02E-13 | 95.19 | 4.81  |
| 1350 | 3.42E-13 | 1.94E-14 | 3.61E-13 | 94.63 | 5.37  |
| 1400 | 4.03E-13 | 2.54E-14 | 4.28E-13 | 94.07 | 5.93  |
| 1450 | 4.73E-13 | 3.29E-14 | 5.06E-13 | 93.50 | 6.50  |
| 1500 | 5.51E-13 | 4.20E-14 | 5.93E-13 | 92.92 | 7.08  |
| 1550 | 6.38E-13 | 5.29E-14 | 6.91E-13 | 92.34 | 7.66  |
| 1600 | 7.34E-13 | 6.61E-14 | 8.00E-13 | 91.74 | 8.26  |
| 1650 | 8.41E-13 | 8.16E-14 | 9.23E-13 | 91.16 | 8.84  |
| 1700 | 9.57E-13 | 9.99E-14 | 1.06E-12 | 90.55 | 9.45  |
| 1750 | 1.09E-12 | 1.21E-13 | 1.21E-12 | 90.01 | 9.99  |
| 1800 | 1.23E-12 | 1.46E-13 | 1.38E-12 | 89.39 | 10.61 |
| 1850 | 1.38E-12 | 1.74E-13 | 1.55E-12 | 88.80 | 11.20 |
| 1900 | 1.54E-12 | 2.07E-13 | 1.75E-12 | 88.15 | 11.85 |
| 1950 | 1.72E-12 | 2.44E-13 | 1.96E-12 | 87.58 | 12.42 |
| 2000 | 1.92E-12 | 2.86E-13 | 2.21E-12 | 87.04 | 12.96 |



**Table S19.** The contribution ratio at a W1 method for all six reaction channels in the temperature range 200-2000 K.

| Contribution ratios |                        |                        |                                       |                                        |                                       |                                        |
|---------------------|------------------------|------------------------|---------------------------------------|----------------------------------------|---------------------------------------|----------------------------------------|
| T(K)                | X1                     | X2                     | X3                                    | Y1                                     | X4                                    | Y2                                     |
|                     | OH + CHCl <sub>3</sub> | SH + CHCl <sub>3</sub> | CH <sub>3</sub> O + CHCl <sub>3</sub> | CH <sub>2</sub> OH + CHCl <sub>3</sub> | CH <sub>3</sub> S + CHCl <sub>3</sub> | CH <sub>2</sub> SH + CHCl <sub>3</sub> |
| 200                 | 0.00                   | 0.34                   | 0.00                                  | 0.00                                   | 99.66                                 | 0.00                                   |
| 225                 | 0.00                   | 0.57                   | 0.00                                  | 0.00                                   | 99.43                                 | 0.00                                   |
| 250                 | 0.00                   | 0.89                   | 0.00                                  | 0.00                                   | 99.10                                 | 0.00                                   |
| 275                 | 0.00                   | 1.32                   | 0.00                                  | 0.00                                   | 98.68                                 | 0.00                                   |
| 298                 | 0.00                   | 1.82                   | 0.00                                  | 0.00                                   | 98.17                                 | 0.01                                   |
| 300                 | 0.00                   | 1.86                   | 0.00                                  | 0.00                                   | 98.13                                 | 0.01                                   |
| 325                 | 0.00                   | 2.51                   | 0.00                                  | 0.01                                   | 97.47                                 | 0.01                                   |
| 350                 | 0.00                   | 3.24                   | 0.00                                  | 0.01                                   | 96.73                                 | 0.02                                   |
| 375                 | 0.00                   | 4.06                   | 0.00                                  | 0.02                                   | 95.89                                 | 0.03                                   |
| 400                 | 0.00                   | 4.96                   | 0.00                                  | 0.03                                   | 94.97                                 | 0.05                                   |
| 450                 | 0.00                   | 0.07                   | 0.00                                  | 0.00                                   | 0.93                                  | 0.00                                   |
| 500                 | 0.00                   | 0.09                   | 0.00                                  | 0.00                                   | 0.91                                  | 0.00                                   |
| 550                 | 0.00                   | 0.11                   | 0.00                                  | 0.00                                   | 0.89                                  | 0.00                                   |
| 600                 | 0.00                   | 0.13                   | 0.00                                  | 0.00                                   | 0.86                                  | 0.00                                   |
| 650                 | 0.00                   | 0.15                   | 0.00                                  | 0.00                                   | 0.84                                  | 0.01                                   |
| 700                 | 0.00                   | 0.17                   | 0.00                                  | 0.01                                   | 0.82                                  | 0.01                                   |
| 750                 | 0.00                   | 0.18                   | 0.00                                  | 0.01                                   | 0.80                                  | 0.01                                   |
| 800                 | 0.00                   | 0.20                   | 0.00                                  | 0.01                                   | 0.78                                  | 0.01                                   |
| 850                 | 0.00                   | 0.21                   | 0.00                                  | 0.01                                   | 0.75                                  | 0.02                                   |

|      |      |      |      |      |      |      |
|------|------|------|------|------|------|------|
| 900  | 0.00 | 0.22 | 0.00 | 0.02 | 0.73 | 0.02 |
| 950  | 0.00 | 0.24 | 0.00 | 0.02 | 0.72 | 0.02 |
| 1000 | 0.00 | 0.25 | 0.00 | 0.02 | 0.70 | 0.03 |
| 1050 | 0.00 | 0.26 | 0.01 | 0.03 | 0.68 | 0.03 |
| 1100 | 0.00 | 0.26 | 0.01 | 0.03 | 0.66 | 0.03 |
| 1150 | 0.00 | 0.27 | 0.01 | 0.04 | 0.65 | 0.04 |
| 1200 | 0.00 | 0.28 | 0.01 | 0.04 | 0.63 | 0.04 |
| 1250 | 0.00 | 0.28 | 0.01 | 0.04 | 0.62 | 0.05 |
| 1300 | 0.00 | 0.29 | 0.01 | 0.05 | 0.60 | 0.05 |
| 1350 | 0.00 | 0.29 | 0.01 | 0.05 | 0.59 | 0.05 |
| 1400 | 0.00 | 0.30 | 0.01 | 0.05 | 0.58 | 0.06 |
| 1450 | 0.00 | 0.30 | 0.02 | 0.06 | 0.56 | 0.06 |
| 1500 | 0.00 | 0.30 | 0.02 | 0.06 | 0.55 | 0.06 |
| 1550 | 0.00 | 0.30 | 0.02 | 0.07 | 0.54 | 0.07 |
| 1600 | 0.00 | 0.31 | 0.02 | 0.07 | 0.53 | 0.07 |
| 1650 | 0.00 | 0.31 | 0.02 | 0.07 | 0.52 | 0.07 |
| 1700 | 0.00 | 0.31 | 0.02 | 0.08 | 0.51 | 0.08 |
| 1750 | 0.00 | 0.31 | 0.03 | 0.08 | 0.50 | 0.08 |
| 1800 | 0.00 | 0.31 | 0.03 | 0.08 | 0.49 | 0.08 |
| 1850 | 0.00 | 0.31 | 0.03 | 0.09 | 0.48 | 0.09 |
| 1900 | 0.00 | 0.31 | 0.03 | 0.09 | 0.47 | 0.09 |
| 1950 | 0.00 | 0.31 | 0.03 | 0.09 | 0.47 | 0.09 |
| 2000 | 0.00 | 0.31 | 0.04 | 0.10 | 0.46 | 0.09 |

**Table S20:** Calculated TST, TST/W, and TST/ZCT rate coefficient ( $\text{cm}^3 \text{molecule}^{-1}\text{s}^{-1}$ ) for reaction  $\text{CCl}_3+\text{H}_2\text{O}$  at W1 method along with CVT and CVT/SCT in the temperature range of 200–2000 K at 1atm Pressure.

| T(K) | Rate coefficient, k ( $\text{cm}^3 \text{molecule}^{-1}\text{s}^{-1}$ ) |          |           |          |           | Ratios |      |
|------|-------------------------------------------------------------------------|----------|-----------|----------|-----------|--------|------|
|      | $k_{x1}(\text{HO-H})$                                                   |          |           |          |           | B/A    | C/A  |
|      | A=TST                                                                   | B=TST/W  | C=TST/ZCT | D=CVT    | E=CVT/SCT |        |      |
| 200  | 9.34E-43                                                                | 9.87E-43 | 9.71E-43  | 6.31E-41 | 7.32E-38  | 1.06   | 1.04 |
| 225  | 1.82E-39                                                                | 1.90E-39 | 1.88E-39  | 7.14E-38 | 3.40E-35  | 1.04   | 1.03 |
| 250  | 7.91E-37                                                                | 8.19E-37 | 8.10E-37  | 2.01E-35 | 4.69E-33  | 1.04   | 1.02 |
| 275  | 1.15E-34                                                                | 1.19E-34 | 1.18E-34  | 2.05E-33 | 2.68E-31  | 1.03   | 1.03 |
| 298  | 5.44E-33                                                                | 5.58E-33 | 5.53E-33  | 7.35E-32 | 6.15E-30  | 1.03   | 1.02 |
| 300  | 7.40E-33                                                                | 7.58E-33 | 7.52E-33  | 9.78E-32 | 7.90E-30  | 1.02   | 1.02 |
| 325  | 2.53E-31                                                                | 2.58E-31 | 2.57E-31  | 2.60E-30 | 1.40E-28  | 1.02   | 1.02 |
| 350  | 5.27E-30                                                                | 5.37E-30 | 5.34E-30  | 4.37E-29 | 1.66E-27  | 1.02   | 1.01 |
| 375  | 7.40E-29                                                                | 7.52E-29 | 7.48E-29  | 5.09E-28 | 1.43E-26  | 1.02   | 1.01 |
| 400  | 7.53E-28                                                                | 7.63E-28 | 7.60E-28  | 4.40E-27 | 9.52E-26  | 1.01   | 1.01 |
| 450  | 3.67E-26                                                                | 3.71E-26 | 3.70E-26  | 1.63E-25 | 2.29E-24  | 1.01   | 1.01 |
| 500  | 8.45E-25                                                                | 8.53E-25 | 8.50E-25  | 3.02E-24 | 3.00E-23  | 1.01   | 1.01 |
| 550  | 1.12E-23                                                                | 1.13E-23 | 1.13E-23  | 3.37E-23 | 2.52E-22  | 1.01   | 1.01 |
| 600  | 9.92E-23                                                                | 9.98E-23 | 9.96E-23  | 2.56E-22 | 1.52E-21  | 1.01   | 1.00 |
| 650  | 6.37E-22                                                                | 6.41E-22 | 6.39E-22  | 1.45E-21 | 7.09E-21  | 1.01   | 1.00 |
| 700  | 3.19E-21                                                                | 3.20E-21 | 3.20E-21  | 6.49E-21 | 2.70E-20  | 1.00   | 1.00 |
| 750  | 1.30E-20                                                                | 1.31E-20 | 1.31E-20  | 2.42E-20 | 8.75E-20  | 1.01   | 1.01 |
| 800  | 4.54E-20                                                                | 4.55E-20 | 4.55E-20  | 7.74E-20 | 2.48E-19  | 1.00   | 1.00 |
| 850  | 1.38E-19                                                                | 1.38E-19 | 1.38E-19  | 2.19E-19 | 6.32E-19  | 1.00   | 1.00 |
| 900  | 3.74E-19                                                                | 3.75E-19 | 3.75E-19  | 5.56E-19 | 1.47E-18  | 1.00   | 1.00 |

|      |          |          |          |          |          |      |      |
|------|----------|----------|----------|----------|----------|------|------|
| 950  | 9.22E-19 | 9.24E-19 | 9.23E-19 | 1.29E-18 | 3.15E-18 | 1.00 | 1.00 |
| 1000 | 2.09E-18 | 2.10E-18 | 2.10E-18 | 2.79E-18 | 6.32E-18 | 1.00 | 1.00 |
| 1050 | 4.44E-18 | 4.44E-18 | 4.44E-18 | 5.64E-18 | 1.20E-17 | 1.00 | 1.00 |
| 1100 | 8.84E-18 | 8.86E-18 | 8.85E-18 | 1.08E-17 | 2.17E-17 | 1.00 | 1.00 |
| 1150 | 1.67E-17 | 1.67E-17 | 1.67E-17 | 1.96E-17 | 3.74E-17 | 1.00 | 1.00 |
| 1200 | 3.01E-17 | 3.01E-17 | 3.01E-17 | 3.41E-17 | 6.22E-17 | 1.00 | 1.00 |
| 1250 | 5.20E-17 | 5.21E-17 | 5.21E-17 | 5.70E-17 | 1.00E-16 | 1.00 | 1.00 |
| 1300 | 8.67E-17 | 8.69E-17 | 8.68E-17 | 9.23E-17 | 1.56E-16 | 1.00 | 1.00 |
| 1350 | 1.40E-16 | 1.40E-16 | 1.40E-16 | 1.45E-16 | 2.37E-16 | 1.00 | 1.00 |
| 1400 | 2.19E-16 | 2.19E-16 | 2.19E-16 | 2.21E-16 | 3.51E-16 | 1.00 | 1.00 |
| 1450 | 3.34E-16 | 3.34E-16 | 3.34E-16 | 3.29E-16 | 5.08E-16 | 1.00 | 1.00 |
| 1500 | 4.96E-16 | 4.97E-16 | 4.97E-16 | 4.79E-16 | 7.21E-16 | 1.00 | 1.00 |
| 1550 | 7.22E-16 | 7.23E-16 | 7.23E-16 | 6.84E-16 | 1.00E-15 | 1.00 | 1.00 |
| 1600 | 1.03E-15 | 1.03E-15 | 1.03E-15 | 9.58E-16 | 1.38E-15 | 1.00 | 1.00 |
| 1650 | 1.44E-15 | 1.44E-15 | 1.44E-15 | 1.32E-15 | 1.86E-15 | 1.00 | 1.00 |
| 1700 | 1.99E-15 | 1.99E-15 | 1.99E-15 | 1.79E-15 | 2.47E-15 | 1.00 | 1.00 |
| 1750 | 2.69E-15 | 2.70E-15 | 2.69E-15 | 2.39E-15 | 3.25E-15 | 1.00 | 1.00 |
| 1800 | 3.60E-15 | 3.60E-15 | 3.60E-15 | 3.15E-15 | 4.22E-15 | 1.00 | 1.00 |
| 1850 | 4.75E-15 | 4.75E-15 | 4.75E-15 | 4.10E-15 | 5.41E-15 | 1.00 | 1.00 |
| 1900 | 6.19E-15 | 6.19E-15 | 6.19E-15 | 5.28E-15 | 6.88E-15 | 1.00 | 1.00 |
| 1950 | 7.98E-15 | 7.98E-15 | 7.98E-15 | 6.72E-15 | 8.65E-15 | 1.00 | 1.00 |
| 2000 | 1.02E-14 | 1.02E-14 | 1.02E-14 | 8.48E-15 | 1.08E-14 | 1.00 | 1.00 |

**Table S21:** Calculated TST, TST/W, and TST/ZCT rate coefficients ( $\text{cm}^3 \text{molecule}^{-1}\text{s}^{-1}$ ) for reaction  $\text{CCl}_3+\text{H}_2\text{S}$  at W1 method along with CVT and CVT/SCT in the temperature range of 200–2000 K at 1atm Pressure.

| T(K) | Rate coefficient, k ( $\text{cm}^3 \text{molecule}^{-1}\text{s}^{-1}$ ) |          |           |          |           | Ratios |       |
|------|-------------------------------------------------------------------------|----------|-----------|----------|-----------|--------|-------|
|      | $k_{x2}$ (HS-H)                                                         |          |           |          |           | B/A    | C/A   |
|      | A=TST                                                                   | B=TST/W  | C=TST/ZCT | D=CVT    | E=CVT/SCT |        |       |
| 200  | 2.11E-21                                                                | 1.02E-20 | 5.78E-20  | 7.65E-20 | 8.50E-19  | 4.83   | 27.39 |
| 225  | 1.61E-20                                                                | 6.52E-20 | 1.98E-19  | 3.72E-19 | 2.71E-18  | 4.05   | 12.30 |
| 250  | 8.40E-20                                                                | 2.91E-19 | 5.96E-19  | 1.35E-18 | 7.08E-18  | 3.46   | 7.10  |
| 275  | 3.30E-19                                                                | 1.00E-18 | 1.59E-18  | 3.97E-18 | 1.60E-17  | 3.03   | 4.82  |
| 298  | 9.65E-19                                                                | 2.64E-18 | 3.59E-18  | 9.28E-18 | 3.06E-17  | 2.74   | 3.72  |
| 300  | 1.05E-18                                                                | 2.85E-18 | 3.83E-18  | 9.94E-18 | 3.23E-17  | 2.71   | 3.65  |
| 325  | 2.85E-18                                                                | 6.99E-18 | 8.41E-18  | 2.20E-17 | 5.98E-17  | 2.45   | 2.95  |
| 350  | 6.78E-18                                                                | 1.53E-17 | 1.70E-17  | 4.40E-17 | 1.03E-16  | 2.26   | 2.51  |
| 375  | 1.46E-17                                                                | 3.05E-17 | 3.22E-17  | 8.15E-17 | 1.68E-16  | 2.09   | 2.21  |
| 400  | 2.88E-17                                                                | 5.64E-17 | 5.74E-17  | 1.42E-16 | 2.62E-16  | 1.96   | 1.99  |
| 450  | 9.22E-17                                                                | 1.62E-16 | 1.58E-16  | 3.67E-16 | 5.68E-16  | 1.76   | 1.71  |
| 500  | 2.42E-16                                                                | 3.91E-16 | 3.73E-16  | 8.15E-16 | 1.10E-15  | 1.62   | 1.54  |
| 550  | 5.50E-16                                                                | 8.29E-16 | 7.83E-16  | 1.61E-15 | 1.96E-15  | 1.51   | 1.42  |
| 600  | 1.12E-15                                                                | 1.59E-15 | 1.50E-15  | 2.93E-15 | 3.25E-15  | 1.42   | 1.34  |
| 650  | 2.08E-15                                                                | 2.83E-15 | 2.67E-15  | 4.97E-15 | 5.14E-15  | 1.36   | 1.28  |
| 700  | 3.60E-15                                                                | 4.73E-15 | 4.47E-15  | 7.96E-15 | 7.77E-15  | 1.31   | 1.24  |
| 750  | 5.90E-15                                                                | 7.51E-15 | 7.11E-15  | 1.22E-14 | 1.13E-14  | 1.27   | 1.21  |
| 800  | 9.22E-15                                                                | 1.14E-14 | 1.09E-14  | 1.80E-14 | 1.61E-14  | 1.24   | 1.18  |
| 850  | 1.38E-14                                                                | 1.68E-14 | 1.60E-14  | 2.57E-14 | 2.22E-14  | 1.22   | 1.16  |

|      |          |          |          |          |          |      |      |
|------|----------|----------|----------|----------|----------|------|------|
| 900  | 2.01E-14 | 2.39E-14 | 2.29E-14 | 3.58E-14 | 3.00E-14 | 1.19 | 1.14 |
| 950  | 2.84E-14 | 3.32E-14 | 3.18E-14 | 4.86E-14 | 3.98E-14 | 1.17 | 1.12 |
| 1000 | 3.90E-14 | 4.50E-14 | 4.33E-14 | 6.46E-14 | 5.18E-14 | 1.15 | 1.11 |
| 1050 | 5.25E-14 | 5.98E-14 | 5.77E-14 | 8.44E-14 | 6.66E-14 | 1.14 | 1.10 |
| 1100 | 6.92E-14 | 7.80E-14 | 7.54E-14 | 1.08E-13 | 8.44E-14 | 1.13 | 1.09 |
| 1150 | 8.97E-14 | 1.00E-13 | 9.71E-14 | 1.37E-13 | 1.06E-13 | 1.11 | 1.08 |
| 1200 | 1.15E-13 | 1.27E-13 | 1.23E-13 | 1.72E-13 | 1.31E-13 | 1.10 | 1.07 |
| 1250 | 1.44E-13 | 1.58E-13 | 1.54E-13 | 2.13E-13 | 1.60E-13 | 1.10 | 1.07 |
| 1300 | 1.79E-13 | 1.96E-13 | 1.91E-13 | 2.60E-13 | 1.95E-13 | 1.09 | 1.07 |
| 1350 | 2.20E-13 | 2.39E-13 | 2.33E-13 | 3.15E-13 | 2.35E-13 | 1.09 | 1.06 |
| 1400 | 2.68E-13 | 2.89E-13 | 2.83E-13 | 3.78E-13 | 2.81E-13 | 1.08 | 1.06 |
| 1450 | 3.23E-13 | 3.47E-13 | 3.40E-13 | 4.51E-13 | 3.34E-13 | 1.07 | 1.05 |
| 1500 | 3.86E-13 | 4.13E-13 | 4.05E-13 | 5.33E-13 | 3.94E-13 | 1.07 | 1.05 |
| 1550 | 4.58E-13 | 4.87E-13 | 4.78E-13 | 6.26E-13 | 4.61E-13 | 1.06 | 1.04 |
| 1600 | 5.39E-13 | 5.72E-13 | 5.61E-13 | 7.31E-13 | 5.38E-13 | 1.06 | 1.04 |
| 1650 | 6.30E-13 | 6.66E-13 | 6.55E-13 | 8.48E-13 | 6.23E-13 | 1.06 | 1.04 |
| 1700 | 7.32E-13 | 7.71E-13 | 7.59E-13 | 9.78E-13 | 7.19E-13 | 1.05 | 1.04 |
| 1750 | 8.46E-13 | 8.88E-13 | 8.75E-13 | 1.12E-12 | 8.25E-13 | 1.05 | 1.03 |
| 1800 | 9.71E-13 | 1.02E-12 | 1.00E-12 | 1.28E-12 | 9.42E-13 | 1.05 | 1.03 |
| 1850 | 1.11E-12 | 1.16E-12 | 1.14E-12 | 1.46E-12 | 1.07E-12 | 1.05 | 1.03 |
| 1900 | 1.26E-12 | 1.32E-12 | 1.30E-12 | 1.65E-12 | 1.22E-12 | 1.05 | 1.03 |
| 1950 | 1.43E-12 | 1.49E-12 | 1.47E-12 | 1.86E-12 | 1.37E-12 | 1.04 | 1.03 |
| 2000 | 1.61E-12 | 1.68E-12 | 1.66E-12 | 2.09E-12 | 1.54E-12 | 1.04 | 1.03 |

**Table S22:** Calculated TST, TST/W, and TST/ZCT rate coefficient ( $\text{cm}^3 \text{molecule}^{-1} \text{s}^{-1}$ ) for reaction  $\text{CCl}_3 + \text{CH}_3\text{O-H}$  (X3) at W1 method along with CVT and CVT/SCT in the temperature range of 200–2000 K at 1atm Pressure.

|      | Rate coefficient, k (cm <sup>3</sup> molecule <sup>-1</sup> s <sup>-1</sup> ) |          |           |          |           | Ratios |       |
|------|-------------------------------------------------------------------------------|----------|-----------|----------|-----------|--------|-------|
|      | k <sub>x3</sub> (O-H)                                                         |          |           |          |           |        |       |
| T(K) | A=TST                                                                         | B=TST/W  | C=TST/ZCT | D=CVT    | E=CVT/SCT | B/A    | C/A   |
| 200  | 2.68E-29                                                                      | 1.68E-28 | 4.61E-28  | 9.11E-28 | 3.42E-30  | 6.27   | 17.20 |
| 225  | 1.42E-27                                                                      | 7.34E-27 | 1.38E-26  | 3.12E-26 | 2.17E-28  | 5.17   | 9.72  |
| 250  | 3.51E-26                                                                      | 1.53E-25 | 2.23E-25  | 5.42E-25 | 6.21E-27  | 4.36   | 6.35  |
| 275  | 4.94E-25                                                                      | 1.87E-24 | 2.29E-24  | 5.75E-24 | 9.89E-26  | 3.79   | 4.64  |
| 298  | 3.87E-24                                                                      | 1.31E-23 | 1.43E-23  | 3.63E-23 | 8.54E-25  | 3.39   | 3.70  |
| 300  | 4.57E-24                                                                      | 1.52E-23 | 1.66E-23  | 4.21E-23 | 1.02E-24  | 3.33   | 3.63  |
| 325  | 3.05E-23                                                                      | 9.13E-23 | 9.18E-23  | 2.31E-22 | 7.42E-24  | 2.99   | 3.01  |
| 350  | 1.58E-22                                                                      | 4.29E-22 | 4.08E-22  | 1.01E-21 | 4.16E-23  | 2.72   | 2.58  |
| 375  | 6.65E-22                                                                      | 1.66E-21 | 1.52E-21  | 3.69E-21 | 1.88E-22  | 2.50   | 2.29  |
| 400  | 2.37E-21                                                                      | 5.49E-21 | 4.90E-21  | 1.16E-20 | 7.12E-22  | 2.32   | 2.07  |
| 450  | 2.03E-20                                                                      | 4.14E-20 | 3.61E-20  | 8.13E-20 | 6.79E-21  | 2.04   | 1.78  |
| 500  | 1.18E-19                                                                      | 2.17E-19 | 1.87E-19  | 4.00E-19 | 4.29E-20  | 1.84   | 1.58  |
| 550  | 5.09E-19                                                                      | 8.64E-19 | 7.48E-19  | 1.52E-18 | 2.00E-19  | 1.70   | 1.47  |
| 600  | 1.77E-18                                                                      | 2.81E-18 | 2.45E-18  | 4.77E-18 | 7.41E-19  | 1.59   | 1.38  |
| 650  | 5.21E-18                                                                      | 7.81E-18 | 6.86E-18  | 1.28E-17 | 2.30E-18  | 1.50   | 1.32  |
| 700  | 1.34E-17                                                                      | 1.91E-17 | 1.70E-17  | 3.05E-17 | 6.19E-18  | 1.43   | 1.27  |
| 750  | 3.09E-17                                                                      | 4.24E-17 | 3.79E-17  | 6.60E-17 | 1.49E-17  | 1.37   | 1.23  |
| 800  | 6.51E-17                                                                      | 8.65E-17 | 7.80E-17  | 1.31E-16 | 3.25E-17  | 1.33   | 1.20  |
| 850  | 1.27E-16                                                                      | 1.64E-16 | 1.50E-16  | 2.45E-16 | 6.58E-17  | 1.29   | 1.18  |

|      |          |          |          |          |          |      |      |
|------|----------|----------|----------|----------|----------|------|------|
| 900  | 2.34E-16 | 2.95E-16 | 2.70E-16 | 4.31E-16 | 1.25E-16 | 1.26 | 1.15 |
| 950  | 4.08E-16 | 5.03E-16 | 4.64E-16 | 7.23E-16 | 2.23E-16 | 1.23 | 1.14 |
| 1000 | 6.79E-16 | 8.22E-16 | 7.63E-16 | 1.16E-15 | 3.80E-16 | 1.21 | 1.12 |
| 1050 | 1.09E-15 | 1.29E-15 | 1.21E-15 | 1.80E-15 | 6.22E-16 | 1.18 | 1.11 |
| 1100 | 1.68E-15 | 1.97E-15 | 1.85E-15 | 9.52E-18 | 1.06E-17 | 1.17 | 1.10 |
| 1150 | 2.52E-15 | 2.92E-15 | 2.75E-15 | 1.13E-17 | 1.25E-17 | 1.16 | 1.09 |
| 1200 | 3.67E-15 | 4.21E-15 | 3.98E-15 | 1.31E-17 | 1.44E-17 | 1.15 | 1.08 |
| 1250 | 5.23E-15 | 5.93E-15 | 5.63E-15 | 1.50E-17 | 1.64E-17 | 1.13 | 1.08 |
| 1300 | 7.29E-15 | 8.20E-15 | 7.81E-15 | 1.68E-17 | 1.84E-17 | 1.12 | 1.07 |
| 1350 | 9.96E-15 | 1.11E-14 | 1.06E-14 | 1.87E-17 | 2.03E-17 | 1.11 | 1.06 |
| 1400 | 1.34E-14 | 1.48E-14 | 1.42E-14 | 2.05E-17 | 2.23E-17 | 1.10 | 1.06 |
| 1450 | 1.77E-14 | 1.95E-14 | 1.87E-14 | 2.22E-17 | 2.41E-17 | 1.10 | 1.06 |
| 1500 | 2.31E-14 | 2.52E-14 | 2.43E-14 | 2.39E-17 | 2.59E-17 | 1.09 | 1.05 |
| 1550 | 2.96E-14 | 3.22E-14 | 3.11E-14 | 2.55E-17 | 2.75E-17 | 1.09 | 1.05 |
| 1600 | 3.77E-14 | 4.08E-14 | 3.94E-14 | 2.71E-17 | 2.91E-17 | 1.08 | 1.05 |
| 1650 | 4.73E-14 | 5.10E-14 | 4.94E-14 | 2.85E-17 | 3.06E-17 | 1.08 | 1.04 |
| 1700 | 5.88E-14 | 6.31E-14 | 6.12E-14 | 2.99E-17 | 3.20E-17 | 1.07 | 1.04 |
| 1750 | 7.25E-14 | 7.74E-14 | 7.53E-14 | 3.11E-17 | 3.32E-17 | 1.07 | 1.04 |
| 1800 | 8.85E-14 | 9.42E-14 | 9.17E-14 | 3.22E-17 | 3.44E-17 | 1.06 | 1.04 |
| 1850 | 1.07E-13 | 1.14E-13 | 1.11E-13 | 3.33E-17 | 3.55E-17 | 1.07 | 1.04 |
| 1900 | 1.29E-13 | 1.36E-13 | 1.33E-13 | 3.43E-17 | 3.64E-17 | 1.05 | 1.03 |



|      |          |          |          |          |          |      |      |
|------|----------|----------|----------|----------|----------|------|------|
| 1950 | 1.54E-13 | 1.62E-13 | 1.58E-13 | 3.51E-17 | 3.73E-17 | 1.05 | 1.03 |
| 2000 | 1.82E-13 | 1.92E-13 | 1.87E-13 | 3.59E-17 | 3.81E-17 | 1.05 | 1.03 |

**Table S23:** Calculated TST, TST/W, and TST/ZCT rate coefficients ( $\text{cm}^3 \text{ molecule}^{-1} \text{ s}^{-1}$ ) for reaction  $\text{CCl}_3 + \text{H-CH}_2\text{OH}$  (Y1) at W1 method along with CVT and CVT/SCT in the temperature range of 200–2000 K at 1atm Pressure.

| T(K) | Rate coefficient, k ( $\text{cm}^3 \text{ molecule}^{-1} \text{ s}^{-1}$ ) |          |           |          |           | Ratios |        |
|------|----------------------------------------------------------------------------|----------|-----------|----------|-----------|--------|--------|
|      | $k_{Y1}(\text{C-H})$                                                       |          |           |          |           | B/A    | C/A    |
|      | A=TST                                                                      | B=TST/W  | C=TST/ZCT | D=CVT    | E=CVT/SCT |        |        |
| 200  | 4.50E-26                                                                   | 3.00E-25 | 2.46E-23  | 2.88E-30 | 1.04E-28  | 6.67   | 546.67 |
| 225  | 1.04E-24                                                                   | 5.71E-24 | 1.20E-22  | 1.92E-28 | 4.07E-27  | 5.49   | 115.38 |
| 250  | 1.32E-23                                                                   | 6.13E-23 | 5.16E-22  | 5.72E-27 | 7.98E-26  | 4.64   | 39.09  |
| 275  | 1.09E-22                                                                   | 4.35E-22 | 1.97E-21  | 9.46E-26 | 9.44E-25  | 3.99   | 18.07  |
| 298  | 5.63E-22                                                                   | 2.00E-21 | 6.09E-21  | 8.44E-25 | 6.53E-24  | 3.55   | 10.82  |
| 300  | 6.43E-22                                                                   | 2.26E-21 | 6.69E-21  | 1.01E-24 | 7.63E-24  | 3.51   | 10.40  |
| 325  | 2.95E-21                                                                   | 9.28E-21 | 2.04E-20  | 7.60E-24 | 4.59E-23  | 3.15   | 6.92   |
| 350  | 1.11E-20                                                                   | 3.16E-20 | 5.62E-20  | 4.38E-23 | 2.19E-22  | 2.85   | 5.06   |
| 375  | 3.54E-20                                                                   | 9.25E-20 | 1.41E-19  | 2.04E-22 | 8.66E-22  | 2.61   | 3.98   |
| 400  | 9.93E-20                                                                   | 2.40E-19 | 3.28E-19  | 7.94E-22 | 2.93E-21  | 2.42   | 3.30   |
| 450  | 5.73E-19                                                                   | 1.22E-18 | 1.44E-18  | 7.95E-21 | 2.35E-20  | 2.13   | 2.51   |
| 500  | 2.42E-18                                                                   | 4.63E-18 | 5.03E-18  | 5.23E-20 | 1.30E-19  | 1.91   | 2.08   |
| 550  | 8.15E-18                                                                   | 1.43E-17 | 1.48E-17  | 2.53E-19 | 5.48E-19  | 1.75   | 1.82   |
| 600  | 2.30E-17                                                                   | 3.76E-17 | 3.78E-17  | 9.65E-19 | 1.88E-18  | 1.63   | 1.64   |
| 650  | 5.68E-17                                                                   | 8.73E-17 | 8.63E-17  | 3.07E-18 | 5.48E-18  | 1.54   | 1.52   |
| 700  | 1.26E-16                                                                   | 1.84E-16 | 1.80E-16  | 8.43E-18 | 1.40E-17  | 1.46   | 1.43   |
| 750  | 2.55E-16                                                                   | 3.58E-16 | 3.48E-16  | 2.06E-17 | 3.22E-17  | 1.40   | 1.36   |

|      |          |          |          |          |          |      |      |
|------|----------|----------|----------|----------|----------|------|------|
| 800  | 4.80E-16 | 6.50E-16 | 6.30E-16 | 4.56E-17 | 6.79E-17 | 1.35 | 1.31 |
| 850  | 8.51E-16 | 1.12E-15 | 1.08E-15 | 9.30E-17 | 1.33E-16 | 1.32 | 1.27 |
| 900  | 1.43E-15 | 1.84E-15 | 1.77E-15 | 1.77E-16 | 2.45E-16 | 1.29 | 1.24 |
| 950  | 2.31E-15 | 2.89E-15 | 2.80E-15 | 3.19E-16 | 4.27E-16 | 1.25 | 1.21 |
| 1000 | 3.59E-15 | 4.40E-15 | 4.26E-15 | 5.46E-16 | 7.11E-16 | 1.23 | 1.19 |
| 1050 | 5.38E-15 | 6.49E-15 | 6.29E-15 | 8.95E-16 | 1.14E-15 | 1.21 | 1.17 |
| 1100 | 7.85E-15 | 9.32E-15 | 9.04E-15 | 1.41E-15 | 1.76E-15 | 1.19 | 1.15 |
| 1150 | 1.11E-14 | 1.31E-14 | 1.27E-14 | 2.15E-15 | 2.64E-15 | 1.18 | 1.14 |
| 1200 | 1.55E-14 | 1.79E-14 | 1.74E-14 | 3.19E-15 | 3.84E-15 | 1.15 | 1.12 |
| 1250 | 2.11E-14 | 2.41E-14 | 2.35E-14 | 4.60E-15 | 5.47E-15 | 1.14 | 1.11 |
| 1300 | 2.82E-14 | 3.20E-14 | 3.12E-14 | 6.48E-15 | 7.61E-15 | 1.13 | 1.11 |
| 1350 | 3.70E-14 | 4.16E-14 | 4.07E-14 | 8.95E-15 | 1.04E-14 | 1.12 | 1.10 |
| 1400 | 4.80E-14 | 5.35E-14 | 5.23E-14 | 1.21E-14 | 1.39E-14 | 1.11 | 1.09 |
| 1450 | 6.13E-14 | 6.79E-14 | 6.65E-14 | 1.61E-14 | 1.84E-14 | 1.11 | 1.08 |
| 1500 | 7.74E-14 | 8.52E-14 | 8.34E-14 | 2.11E-14 | 2.39E-14 | 1.10 | 1.08 |
| 1550 | 9.65E-14 | 1.06E-13 | 1.04E-13 | 2.73E-14 | 3.06E-14 | 1.10 | 1.08 |
| 1600 | 1.19E-13 | 1.30E-13 | 1.27E-13 | 3.48E-14 | 3.88E-14 | 1.09 | 1.07 |
| 1650 | 1.46E-13 | 1.58E-13 | 1.55E-13 | 9.25E-17 | 3.32E-17 | 1.08 | 1.06 |
| 1700 | 1.77E-13 | 1.91E-13 | 1.87E-13 | 9.33E-17 | 3.44E-17 | 1.08 | 1.06 |
| 1750 | 2.13E-13 | 2.28E-13 | 2.25E-13 | 9.39E-17 | 3.55E-17 | 1.07 | 1.06 |
| 1800 | 2.54E-13 | 2.71E-13 | 2.67E-13 | 9.42E-17 | 3.65E-17 | 1.07 | 1.05 |
| 1850 | 3.01E-13 | 3.21E-13 | 3.16E-13 | 9.42E-17 | 3.74E-17 | 1.07 | 1.05 |
| 1900 | 3.54E-13 | 3.76E-13 | 3.71E-13 | 9.39E-17 | 3.81E-17 | 1.06 | 1.05 |
| 1950 | 4.14E-13 | 4.39E-13 | 4.33E-13 | 9.35E-17 | 3.88E-17 | 1.06 | 1.05 |
| 2000 | 4.82E-13 | 5.09E-13 | 5.03E-13 | 9.29E-17 | 3.93E-17 | 1.06 | 1.04 |

**Table S24:** Calculated TST, TST/W, and TST/ZCT rate coefficients ( $\text{cm}^3 \text{molecule}^{-1} \text{s}^{-1}$ ) for reaction  $\text{CCl}_3 + \text{CH}_3\text{S-H}$  (X4) at W1 method along with CVT and CVT/SCT in the temperature range of 200–2000 K at 1atm Pressure.

|      | Rate coefficient, k ( $\text{cm}^3 \text{molecule}^{-1} \text{s}^{-1}$ ) |          |           |          |           | Ratios |       |
|------|--------------------------------------------------------------------------|----------|-----------|----------|-----------|--------|-------|
|      | $k_{X4}$ (S-H)                                                           |          |           |          |           |        |       |
| T(K) | A=TST                                                                    | B=TST/W  | C=TST/ZCT | D=CVT    | E=CVT/SCT | B/A    | C/A   |
| 200  | 1.61E-18                                                                 | 7.20E-18 | 1.71E-17  | 5.05E-21 | 1.80E-19  | 4.47   | 10.62 |
| 225  | 5.53E-18                                                                 | 2.07E-17 | 3.47E-17  | 3.14E-20 | 6.59E-19  | 3.74   | 6.27  |
| 250  | 1.52E-17                                                                 | 4.90E-17 | 6.61E-17  | 1.40E-19 | 1.93E-18  | 3.22   | 4.35  |
| 275  | 3.58E-17                                                                 | 1.01E-16 | 1.19E-16  | 4.87E-19 | 4.82E-18  | 2.82   | 3.32  |
| 298  | 7.04E-17                                                                 | 1.80E-16 | 1.94E-16  | 1.30E-18 | 1.00E-17  | 2.56   | 2.76  |
| 300  | 7.43E-17                                                                 | 1.89E-16 | 2.02E-16  | 1.41E-18 | 1.06E-17  | 2.54   | 2.72  |
| 325  | 1.40E-16                                                                 | 3.25E-16 | 3.27E-16  | 3.53E-18 | 2.12E-17  | 2.32   | 2.34  |
| 350  | 2.46E-16                                                                 | 5.25E-16 | 5.08E-16  | 7.89E-18 | 3.91E-17  | 2.13   | 2.07  |
| 375  | 4.06E-16                                                                 | 8.06E-16 | 7.61E-16  | 1.61E-17 | 6.78E-17  | 1.99   | 1.87  |
| 400  | 6.38E-16                                                                 | 1.19E-15 | 1.10E-15  | 3.04E-17 | 1.12E-16  | 1.87   | 1.72  |
| 450  | 1.40E-15                                                                 | 2.35E-15 | 2.15E-15  | 9.11E-17 | 2.67E-16  | 1.68   | 1.54  |
| 500  | 2.71E-15                                                                 | 4.20E-15 | 3.83E-15  | 2.28E-16 | 5.62E-16  | 1.55   | 1.41  |

|      |          |          |          |          |          |      |      |
|------|----------|----------|----------|----------|----------|------|------|
| 550  | 4.79E-15 | 6.99E-15 | 6.38E-15 | 4.97E-16 | 1.07E-15 | 1.46 | 1.33 |
| 600  | 7.92E-15 | 1.10E-14 | 1.01E-14 | 9.79E-16 | 1.90E-15 | 1.39 | 1.28 |
| 650  | 1.24E-14 | 1.64E-14 | 1.52E-14 | 1.78E-15 | 3.16E-15 | 1.32 | 1.23 |
| 700  | 1.85E-14 | 2.37E-14 | 2.20E-14 | 3.02E-15 | 5.00E-15 | 1.28 | 1.19 |
| 750  | 2.67E-14 | 3.32E-14 | 3.10E-14 | 4.88E-15 | 7.61E-15 | 1.24 | 1.16 |
| 800  | 3.72E-14 | 4.53E-14 | 4.26E-14 | 7.52E-15 | 1.12E-14 | 1.22 | 1.15 |
| 850  | 5.06E-14 | 6.03E-14 | 5.70E-14 | 1.12E-14 | 1.59E-14 | 1.19 | 1.13 |
| 900  | 6.73E-14 | 7.88E-14 | 7.48E-14 | 1.61E-14 | 2.21E-14 | 1.17 | 1.11 |
| 950  | 8.78E-14 | 1.01E-13 | 9.65E-14 | 2.25E-14 | 2.99E-14 | 1.15 | 1.10 |
| 1000 | 1.12E-13 | 1.28E-13 | 1.22E-13 | 3.07E-14 | 3.98E-14 | 1.14 | 1.09 |
| 1050 | 1.42E-13 | 1.60E-13 | 1.53E-13 | 4.10E-14 | 5.20E-14 | 1.13 | 1.08 |
| 1100 | 1.77E-13 | 1.97E-13 | 1.89E-13 | 5.37E-14 | 6.68E-14 | 1.11 | 1.07 |
| 1150 | 2.17E-13 | 2.40E-13 | 2.31E-13 | 6.93E-14 | 8.47E-14 | 1.11 | 1.06 |
| 1200 | 2.64E-13 | 2.89E-13 | 2.80E-13 | 8.81E-14 | 1.06E-13 | 1.09 | 1.06 |
| 1250 | 3.18E-13 | 3.46E-13 | 3.36E-13 | 1.11E-13 | 1.31E-13 | 1.09 | 1.06 |
| 1300 | 3.79E-13 | 4.10E-13 | 3.99E-13 | 1.37E-13 | 1.60E-13 | 1.08 | 1.05 |
| 1350 | 4.49E-13 | 4.83E-13 | 4.70E-13 | 1.68E-13 | 1.94E-13 | 1.08 | 1.05 |
| 1400 | 5.27E-13 | 5.64E-13 | 5.50E-13 | 2.04E-13 | 2.34E-13 | 1.07 | 1.04 |
| 1450 | 6.14E-13 | 6.55E-13 | 6.40E-13 | 1.10E-14 | 1.13E-15 | 1.07 | 1.04 |
| 1500 | 7.12E-13 | 7.56E-13 | 7.39E-13 | 9.65E-15 | 1.07E-15 | 1.06 | 1.04 |
| 1550 | 8.20E-13 | 8.67E-13 | 8.49E-13 | 8.53E-15 | 1.01E-15 | 1.06 | 1.04 |

|      |          |          |          |          |          |      |      |
|------|----------|----------|----------|----------|----------|------|------|
| 1600 | 9.39E-13 | 9.90E-13 | 9.71E-13 | 7.57E-15 | 9.58E-16 | 1.05 | 1.03 |
| 1650 | 1.07E-12 | 1.12E-12 | 1.10E-12 | 6.74E-15 | 9.06E-16 | 1.05 | 1.03 |
| 1700 | 1.21E-12 | 1.27E-12 | 1.25E-12 | 6.03E-15 | 8.57E-16 | 1.05 | 1.03 |
| 1750 | 1.37E-12 | 1.43E-12 | 1.41E-12 | 5.41E-15 | 8.11E-16 | 1.04 | 1.03 |
| 1800 | 1.54E-12 | 1.61E-12 | 1.58E-12 | 4.87E-15 | 7.68E-16 | 1.05 | 1.03 |
| 1850 | 1.73E-12 | 1.80E-12 | 1.77E-12 | 4.39E-15 | 7.27E-16 | 1.04 | 1.02 |
| 1900 | 1.93E-12 | 2.00E-12 | 1.97E-12 | 3.98E-15 | 6.89E-16 | 1.04 | 1.02 |
| 1950 | 2.14E-12 | 2.22E-12 | 2.19E-12 | 3.61E-15 | 6.54E-16 | 1.04 | 1.02 |
| 2000 | 2.38E-12 | 2.46E-12 | 2.43E-12 | 3.29E-15 | 6.20E-16 | 1.03 | 1.02 |

**Table S25:** Calculated TST, TST/W, and TST/ZCT rate coefficients ( $\text{cm}^3 \text{molecule}^{-1} \text{s}^{-1}$ ) for reaction  $\text{CCl}_3 + \text{H-CH}_2\text{SH}$  (Y2) at W1 method along with CVT and CVT/SCT in the temperature range of 200–2000 K at 1atm Pressure.

| T(K)  | Rate coefficient, $k$ ( $\text{cm}^3 \text{molecule}^{-1} \text{s}^{-1}$ ) |           |          |           |          | Ratios |         |
|-------|----------------------------------------------------------------------------|-----------|----------|-----------|----------|--------|---------|
|       | $k_{\text{V2}} \text{ (C-H)}$                                              |           |          |           |          | B/A    | C/A     |
| A=TST | B=TST/W                                                                    | C=TST/ZCT | D=CVT    | E=CVT/SCT |          |        |         |
| 200   | 1.16E-25                                                                   | 8.11E-25  | 1.44E-22 | 2.07E-28  | 7.01E-27 | 6.99   | 1241.38 |
| 225   | 2.39E-24                                                                   | 1.37E-23  | 5.05E-22 | 8.05E-27  | 1.61E-25 | 5.73   | 211.30  |
| 250   | 2.77E-23                                                                   | 1.34E-22  | 1.70E-21 | 1.55E-25  | 2.06E-24 | 4.84   | 61.37   |
| 275   | 2.11E-22                                                                   | 8.80E-22  | 5.38E-21 | 1.80E-24  | 1.72E-23 | 4.17   | 25.50   |
| 298   | 1.03E-21                                                                   | 3.82E-21  | 1.46E-20 | 1.21E-23  | 9.04E-23 | 3.71   | 14.17   |
| 300   | 1.17E-21                                                                   | 4.29E-21  | 1.59E-20 | 1.41E-23  | 1.03E-22 | 3.67   | 13.59   |

|      |          |          |          |          |          |      |      |
|------|----------|----------|----------|----------|----------|------|------|
| 325  | 5.09E-21 | 1.67E-20 | 4.35E-20 | 8.28E-23 | 4.83E-22 | 3.28 | 8.55 |
| 350  | 1.83E-20 | 5.41E-20 | 1.10E-19 | 3.83E-22 | 1.85E-21 | 2.96 | 6.01 |
| 375  | 5.61E-20 | 1.52E-19 | 2.58E-19 | 1.47E-21 | 6.06E-21 | 2.71 | 4.60 |
| 400  | 1.52E-19 | 3.80E-19 | 5.66E-19 | 4.83E-21 | 1.74E-20 | 2.50 | 3.72 |
| 450  | 8.28E-19 | 1.81E-18 | 2.27E-18 | 3.64E-20 | 1.05E-19 | 2.19 | 2.74 |
| 500  | 3.34E-18 | 6.55E-18 | 7.43E-18 | 1.90E-19 | 4.62E-19 | 1.96 | 2.22 |
| 550  | 1.08E-17 | 1.94E-17 | 2.07E-17 | 7.60E-19 | 1.62E-18 | 1.80 | 1.92 |
| 600  | 2.96E-17 | 4.93E-17 | 5.07E-17 | 2.48E-18 | 4.75E-18 | 1.67 | 1.71 |
| 650  | 7.09E-17 | 1.11E-16 | 1.12E-16 | 6.90E-18 | 1.21E-17 | 1.57 | 1.58 |
| 700  | 1.53E-16 | 2.28E-16 | 2.26E-16 | 1.69E-17 | 2.78E-17 | 1.49 | 1.48 |
| 750  | 3.04E-16 | 4.34E-16 | 4.26E-16 | 3.75E-17 | 5.81E-17 | 1.43 | 1.40 |
| 800  | 5.62E-16 | 7.73E-16 | 7.55E-16 | 7.64E-17 | 1.13E-16 | 1.38 | 1.34 |
| 850  | 9.80E-16 | 1.31E-15 | 1.27E-15 | 1.45E-16 | 2.05E-16 | 1.34 | 1.30 |
| 900  | 1.63E-15 | 2.11E-15 | 2.05E-15 | 2.60E-16 | 3.55E-16 | 1.29 | 1.26 |
| 950  | 2.59E-15 | 3.28E-15 | 3.18E-15 | 5.69E-16 | 5.86E-16 | 1.27 | 1.23 |
| 1000 | 3.97E-15 | 4.92E-15 | 4.78E-15 | 9.06E-16 | 9.30E-16 | 1.24 | 1.20 |
| 1050 | 5.89E-15 | 7.18E-15 | 6.98E-15 | 1.39E-15 | 1.43E-15 | 1.22 | 1.19 |
| 1100 | 8.51E-15 | 1.02E-14 | 9.92E-15 | 2.08E-15 | 2.12E-15 | 1.20 | 1.17 |
| 1150 | 1.20E-14 | 1.42E-14 | 1.38E-14 | 3.01E-15 | 3.08E-15 | 1.18 | 1.15 |
| 1200 | 1.65E-14 | 1.93E-14 | 1.88E-14 | 4.27E-15 | 4.35E-15 | 1.17 | 1.14 |
| 1250 | 2.23E-14 | 2.57E-14 | 2.51E-14 | 5.92E-15 | 6.03E-15 | 1.15 | 1.13 |
| 1300 | 2.96E-14 | 3.38E-14 | 3.30E-14 | 8.06E-15 | 8.19E-15 | 1.14 | 1.11 |
| 1350 | 3.87E-14 | 4.37E-14 | 4.28E-14 | 1.08E-14 | 1.09E-14 | 1.13 | 1.11 |
| 1400 | 4.98E-14 | 5.59E-14 | 5.47E-14 | 1.42E-14 | 1.44E-14 | 1.12 | 1.10 |

|      |          |          |          |          |          |      |      |
|------|----------|----------|----------|----------|----------|------|------|
| 1450 | 6.32E-14 | 7.05E-14 | 6.90E-14 | 1.84E-14 | 1.87E-14 | 1.12 | 1.09 |
| 1500 | 7.94E-14 | 8.79E-14 | 8.62E-14 | 2.36E-14 | 2.39E-14 | 1.11 | 1.09 |
| 1550 | 9.86E-14 | 1.08E-13 | 1.06E-13 | 2.98E-14 | 3.02E-14 | 1.10 | 1.08 |
| 1600 | 1.21E-13 | 1.33E-13 | 1.30E-13 | 3.73E-14 | 3.77E-14 | 1.10 | 1.07 |
| 1650 | 1.48E-13 | 1.61E-13 | 1.58E-13 | 4.62E-14 | 4.67E-14 | 1.09 | 1.07 |
| 1700 | 1.78E-13 | 1.93E-13 | 1.90E-13 | 5.67E-14 | 5.73E-14 | 1.08 | 1.07 |
| 1750 | 2.14E-13 | 2.30E-13 | 2.27E-13 | 6.90E-14 | 6.97E-14 | 1.07 | 1.06 |
| 1800 | 2.54E-13 | 2.73E-13 | 2.69E-13 | 8.33E-14 | 8.41E-14 | 1.07 | 1.06 |
| 1850 | 3.00E-13 | 3.21E-13 | 3.17E-13 | 9.98E-14 | 1.01E-13 | 1.07 | 1.06 |
| 1900 | 3.52E-13 | 3.76E-13 | 3.71E-13 | 1.19E-13 | 1.20E-13 | 1.07 | 1.05 |
| 1950 | 4.11E-13 | 4.37E-13 | 4.31E-13 | 1.40E-13 | 1.41E-13 | 1.06 | 1.05 |
| 2000 | 4.77E-13 | 5.05E-13 | 4.99E-13 | 1.33E-15 | 1.34E-15 | 1.06 | 1.05 |

**Table S26:** Calculated Rate Coefficients ( $\text{cm}^3 \text{ molecule}^{-1} \text{ s}^{-1}$ ) at W1 and CCSD(T) method for the  $\text{CCl}_3 + \text{H}_2\text{O}$  Reaction at 1atm Pressure.

| T(K) | Rate Coefficient, k ( $\text{cm}^3 \text{ molecule}^{-1} \text{ s}^{-1}$ ) |           |             | Rate Coefficient, k ( $\text{cm}^3 \text{ molecule}^{-1} \text{ s}^{-1}$ ) |           |             |
|------|----------------------------------------------------------------------------|-----------|-------------|----------------------------------------------------------------------------|-----------|-------------|
|      | W1- $k_{x1}$ (HO-H)                                                        |           |             | CCSD(T)- $k_{x1}$ (HO-H)                                                   |           |             |
|      | A=TST/W                                                                    | B=TST/ZCT | Ratios =A/B | C=TST/W                                                                    | D=TST/ZCT | Ratios =C/D |
| 200  | 9.87E-43                                                                   | 9.71E-43  | 1.02        | 7.25E-41                                                                   | 7.21E-41  | 1.01        |
| 225  | 1.90E-39                                                                   | 1.88E-39  | 1.01        | 8.64E-38                                                                   | 8.60E-38  | 1.00        |
| 250  | 8.19E-37                                                                   | 8.10E-37  | 1.01        | 2.53E-35                                                                   | 2.52E-35  | 1.00        |
| 275  | 1.19E-34                                                                   | 1.18E-34  | 1.01        | 2.68E-33                                                                   | 2.67E-33  | 1.00        |
| 298  | 5.58E-33                                                                   | 5.53E-33  | 1.01        | 9.87E-32                                                                   | 9.84E-32  | 1.00        |
| 300  | 7.58E-33                                                                   | 7.52E-33  | 1.01        | 1.32E-31                                                                   | 1.31E-31  | 1.01        |
| 325  | 2.58E-31                                                                   | 2.57E-31  | 1.00        | 3.59E-30                                                                   | 3.58E-30  | 1.00        |

|      |          |          |      |          |          |      |
|------|----------|----------|------|----------|----------|------|
| 350  | 5.37E-30 | 5.34E-30 | 1.01 | 6.18E-29 | 6.16E-29 | 1.00 |
| 375  | 7.52E-29 | 7.48E-29 | 1.01 | 7.33E-28 | 7.31E-28 | 1.00 |
| 400  | 7.63E-28 | 7.60E-28 | 1.00 | 6.44E-27 | 6.43E-27 | 1.00 |
| 450  | 3.71E-26 | 3.70E-26 | 1.00 | 2.46E-25 | 2.46E-25 | 1.00 |
| 500  | 8.53E-25 | 8.50E-25 | 1.00 | 4.67E-24 | 4.66E-24 | 1.00 |
| 550  | 1.13E-23 | 1.13E-23 | 1.00 | 5.30E-23 | 5.29E-23 | 1.00 |
| 600  | 9.98E-23 | 9.96E-23 | 1.00 | 4.09E-22 | 4.09E-22 | 1.00 |
| 650  | 6.41E-22 | 6.39E-22 | 1.00 | 2.35E-21 | 2.35E-21 | 1.00 |
| 700  | 3.20E-21 | 3.20E-21 | 1.00 | 1.07E-20 | 1.07E-20 | 1.00 |
| 750  | 1.31E-20 | 1.31E-20 | 1.00 | 4.03E-20 | 4.02E-20 | 1.00 |
| 800  | 4.55E-20 | 4.55E-20 | 1.00 | 1.30E-19 | 1.30E-19 | 1.00 |
| 850  | 1.38E-19 | 1.38E-19 | 1.00 | 3.71E-19 | 3.71E-19 | 1.00 |
| 900  | 3.75E-19 | 3.75E-19 | 1.00 | 9.51E-19 | 9.50E-19 | 1.00 |
| 950  | 9.24E-19 | 9.23E-19 | 1.00 | 2.23E-18 | 2.23E-18 | 1.00 |
| 1000 | 2.10E-18 | 2.10E-18 | 1.00 | 4.84E-18 | 4.83E-18 | 1.00 |
| 1050 | 4.44E-18 | 4.44E-18 | 1.00 | 9.83E-18 | 9.82E-18 | 1.00 |
| 1100 | 8.86E-18 | 8.85E-18 | 1.00 | 1.89E-17 | 1.88E-17 | 1.01 |
| 1150 | 1.67E-17 | 1.67E-17 | 1.00 | 3.44E-17 | 3.44E-17 | 1.00 |
| 1200 | 3.01E-17 | 3.01E-17 | 1.00 | 6.01E-17 | 6.01E-17 | 1.00 |
| 1250 | 5.21E-17 | 5.21E-17 | 1.00 | 1.01E-16 | 1.01E-16 | 1.00 |
| 1300 | 8.69E-17 | 8.68E-17 | 1.00 | 1.64E-16 | 1.64E-16 | 1.00 |
| 1350 | 1.40E-16 | 1.40E-16 | 1.00 | 2.58E-16 | 2.58E-16 | 1.00 |
| 1400 | 2.19E-16 | 2.19E-16 | 1.00 | 3.94E-16 | 3.94E-16 | 1.00 |
| 1450 | 3.34E-16 | 3.34E-16 | 1.00 | 5.88E-16 | 5.88E-16 | 1.00 |
| 1500 | 4.97E-16 | 4.97E-16 | 1.00 | 8.58E-16 | 8.57E-16 | 1.00 |
| 1550 | 7.23E-16 | 7.23E-16 | 1.00 | 1.22E-15 | 1.22E-15 | 1.00 |
| 1600 | 1.03E-15 | 1.03E-15 | 1.00 | 1.72E-15 | 1.72E-15 | 1.00 |



|      |          |          |      |          |          |      |
|------|----------|----------|------|----------|----------|------|
| 1650 | 1.44E-15 | 1.44E-15 | 1.00 | 2.36E-15 | 2.36E-15 | 1.00 |
| 1700 | 1.99E-15 | 1.99E-15 | 1.00 | 3.21E-15 | 3.21E-15 | 1.00 |
| 1750 | 2.70E-15 | 2.69E-15 | 1.00 | 4.28E-15 | 4.28E-15 | 1.00 |
| 1800 | 3.60E-15 | 3.60E-15 | 1.00 | 5.65E-15 | 5.65E-15 | 1.00 |
| 1850 | 4.75E-15 | 4.75E-15 | 1.00 | 7.36E-15 | 7.35E-15 | 1.00 |
| 1900 | 6.19E-15 | 6.19E-15 | 1.00 | 9.47E-15 | 9.47E-15 | 1.00 |
| 1950 | 7.98E-15 | 7.98E-15 | 1.00 | 1.21E-14 | 1.21E-14 | 1.00 |
| 2000 | 1.02E-14 | 1.02E-14 | 1.00 | 1.52E-14 | 1.52E-14 | 1.00 |

**Table S27:** Calculated Rate Coefficients ( $\text{cm}^3 \text{molecule}^{-1}\text{s}^{-1}$ ) at W1 and CCSD(T) method for the  $\text{CCl}_3+\text{H}_2\text{S}$  Reaction at 1atm Pressure.

| T(K) | Rate Coefficient, k ( $\text{cm}^3 \text{molecule}^{-1}\text{s}^{-1}$ ) |           |                | Rate Coefficient, k ( $\text{cm}^3 \text{molecule}^{-1}\text{s}^{-1}$ ) |           |                |
|------|-------------------------------------------------------------------------|-----------|----------------|-------------------------------------------------------------------------|-----------|----------------|
|      | W1- $k_{X2}$ (HS-H)                                                     |           |                | CCSD(T)- $k_{X2}$ (HS-H)                                                |           |                |
|      | A=TST/W                                                                 | B=TST/ZCT | Ratios=<br>A/B | C=TST/W                                                                 | D=TST/ZCT | Ratios=<br>C/D |
| 200  | 1.02E-20                                                                | 5.78E-20  | 0.18           | 4.68E-21                                                                | 5.97E-20  | 0.08           |
| 225  | 6.52E-20                                                                | 1.98E-19  | 0.33           | 3.20E-20                                                                | 1.71E-19  | 0.19           |
| 250  | 2.91E-19                                                                | 5.96E-19  | 0.49           | 1.51E-19                                                                | 4.65E-19  | 0.32           |
| 275  | 1.00E-18                                                                | 1.59E-18  | 0.63           | 5.45E-19                                                                | 1.17E-18  | 0.47           |
| 298  | 2.64E-18                                                                | 3.59E-18  | 0.74           | 1.48E-18                                                                | 2.57E-18  | 0.58           |
| 300  | 2.85E-18                                                                | 3.83E-18  | 0.74           | 1.61E-18                                                                | 2.74E-18  | 0.59           |
| 325  | 6.99E-18                                                                | 8.41E-18  | 0.83           | 4.08E-18                                                                | 5.91E-18  | 0.69           |
| 350  | 1.53E-17                                                                | 1.70E-17  | 0.90           | 9.17E-18                                                                | 1.19E-17  | 0.77           |
| 375  | 3.05E-17                                                                | 3.22E-17  | 0.95           | 1.87E-17                                                                | 2.24E-17  | 0.83           |
| 400  | 5.64E-17                                                                | 5.74E-17  | 0.98           | 3.54E-17                                                                | 4.01E-17  | 0.88           |
| 450  | 1.62E-16                                                                | 1.58E-16  | 1.03           | 1.05E-16                                                                | 1.11E-16  | 0.95           |
| 500  | 3.91E-16                                                                | 3.73E-16  | 1.05           | 2.61E-16                                                                | 2.65E-16  | 0.98           |
| 550  | 8.29E-16                                                                | 7.83E-16  | 1.06           | 5.67E-16                                                                | 5.62E-16  | 1.01           |
| 600  | 1.59E-15                                                                | 1.50E-15  | 1.06           | 1.11E-15                                                                | 1.09E-15  | 1.02           |

|      |          |          |      |          |          |      |
|------|----------|----------|------|----------|----------|------|
| 650  | 2.83E-15 | 2.67E-15 | 1.06 | 2.00E-15 | 1.95E-15 | 1.03 |
| 700  | 4.73E-15 | 4.47E-15 | 1.06 | 3.39E-15 | 3.30E-15 | 1.03 |
| 750  | 7.51E-15 | 7.11E-15 | 1.06 | 5.46E-15 | 5.30E-15 | 1.03 |
| 800  | 1.14E-14 | 1.09E-14 | 1.05 | 8.39E-15 | 8.15E-15 | 1.03 |
| 850  | 1.68E-14 | 1.60E-14 | 1.05 | 1.24E-14 | 1.21E-14 | 1.02 |
| 900  | 2.39E-14 | 2.29E-14 | 1.04 | 1.79E-14 | 1.74E-14 | 1.03 |
| 950  | 3.32E-14 | 3.18E-14 | 1.04 | 2.50E-14 | 2.43E-14 | 1.03 |
| 1000 | 4.50E-14 | 4.33E-14 | 1.04 | 3.41E-14 | 3.32E-14 | 1.03 |
| 1050 | 5.98E-14 | 5.77E-14 | 1.04 | 4.55E-14 | 4.45E-14 | 1.02 |
| 1100 | 7.80E-14 | 7.54E-14 | 1.03 | 5.97E-14 | 5.84E-14 | 1.02 |
| 1150 | 1.00E-13 | 9.71E-14 | 1.03 | 7.71E-14 | 7.55E-14 | 1.02 |
| 1200 | 1.27E-13 | 1.23E-13 | 1.03 | 9.80E-14 | 9.61E-14 | 1.02 |
| 1250 | 1.58E-13 | 1.54E-13 | 1.03 | 1.23E-13 | 1.21E-13 | 1.02 |
| 1300 | 1.96E-13 | 1.91E-13 | 1.03 | 1.53E-13 | 1.50E-13 | 1.02 |
| 1350 | 2.39E-13 | 2.33E-13 | 1.03 | 1.87E-13 | 1.84E-13 | 1.02 |
| 1400 | 2.89E-13 | 2.83E-13 | 1.02 | 2.27E-13 | 2.24E-13 | 1.01 |
| 1450 | 3.47E-13 | 3.40E-13 | 1.02 | 2.73E-13 | 2.69E-13 | 1.01 |
| 1500 | 4.13E-13 | 4.05E-13 | 1.02 | 3.26E-13 | 3.21E-13 | 1.02 |
| 1550 | 4.87E-13 | 4.78E-13 | 1.02 | 3.86E-13 | 3.81E-13 | 1.01 |
| 1600 | 5.72E-13 | 5.61E-13 | 1.02 | 4.54E-13 | 4.48E-13 | 1.01 |
| 1650 | 6.66E-13 | 6.55E-13 | 1.02 | 5.30E-13 | 5.24E-13 | 1.01 |
| 1700 | 7.71E-13 | 7.59E-13 | 1.02 | 6.15E-13 | 6.08E-13 | 1.01 |
| 1750 | 8.88E-13 | 8.75E-13 | 1.01 | 7.10E-13 | 7.02E-13 | 1.01 |
| 1800 | 1.02E-12 | 1.00E-12 | 1.02 | 8.15E-13 | 8.07E-13 | 1.01 |
| 1850 | 1.16E-12 | 1.14E-12 | 1.02 | 9.31E-13 | 9.22E-13 | 1.01 |
| 1900 | 1.32E-12 | 1.30E-12 | 1.02 | 1.06E-12 | 1.05E-12 | 1.01 |
| 1950 | 1.49E-12 | 1.47E-12 | 1.01 | 1.20E-12 | 1.19E-12 | 1.01 |

|      |          |          |      |          |          |      |
|------|----------|----------|------|----------|----------|------|
| 2000 | 1.68E-12 | 1.66E-12 | 1.01 | 1.35E-12 | 1.34E-12 | 1.01 |
|------|----------|----------|------|----------|----------|------|

**Table S28:** Calculated Rate Coefficients ( $\text{cm}^3\text{molecule}^{-1}\text{s}^{-1}$ ) at a W1 method for the  $\text{CCl}_3+\text{CH}_3\text{OH}$  Reaction at 1atm Pressure.

| T(K) | Rate Coefficient, k ( $\text{cm}^3\text{ molecule}^{-1}\text{ s}^{-1}$ ) |           |                | Rate Coefficient, k ( $\text{cm}^3\text{ molecule}^{-1}\text{ s}^{-1}$ ) |           |                |
|------|--------------------------------------------------------------------------|-----------|----------------|--------------------------------------------------------------------------|-----------|----------------|
|      | $k_{X3}$ (O-H)                                                           |           |                | $k_{Y1}$ (C-H)                                                           |           |                |
|      | A=TST/W                                                                  | B=TST/ZCT | Ratios<br>=A/B | C=TST/W                                                                  | D=TST/ZCT | Ratios<br>=C/D |
| 200  | 1.68E-28                                                                 | 4.61E-28  | 0.36           | 3.00E-25                                                                 | 2.46E-23  | 0.01           |
| 225  | 7.34E-27                                                                 | 1.38E-26  | 0.53           | 5.71E-24                                                                 | 1.20E-22  | 0.05           |
| 250  | 1.53E-25                                                                 | 2.23E-25  | 0.69           | 6.13E-23                                                                 | 5.16E-22  | 0.12           |
| 275  | 1.87E-24                                                                 | 2.29E-24  | 0.82           | 4.35E-22                                                                 | 1.97E-21  | 0.22           |
| 298  | 1.31E-23                                                                 | 1.43E-23  | 0.92           | 2.00E-21                                                                 | 6.09E-21  | 0.33           |
| 300  | 1.52E-23                                                                 | 1.66E-23  | 0.92           | 2.26E-21                                                                 | 6.69E-21  | 0.34           |
| 325  | 9.13E-23                                                                 | 9.18E-23  | 0.99           | 9.28E-21                                                                 | 2.04E-20  | 0.45           |
| 350  | 4.29E-22                                                                 | 4.08E-22  | 1.05           | 3.16E-20                                                                 | 5.62E-20  | 0.56           |
| 375  | 1.66E-21                                                                 | 1.52E-21  | 1.09           | 9.25E-20                                                                 | 1.41E-19  | 0.66           |
| 400  | 5.49E-21                                                                 | 4.90E-21  | 1.12           | 2.40E-19                                                                 | 3.28E-19  | 0.73           |
| 450  | 4.14E-20                                                                 | 3.61E-20  | 1.15           | 1.22E-18                                                                 | 1.44E-18  | 0.85           |
| 500  | 2.17E-19                                                                 | 1.87E-19  | 1.16           | 4.63E-18                                                                 | 5.03E-18  | 0.92           |
| 550  | 8.64E-19                                                                 | 7.48E-19  | 1.16           | 1.43E-17                                                                 | 1.48E-17  | 0.97           |
| 600  | 2.81E-18                                                                 | 2.45E-18  | 1.15           | 3.76E-17                                                                 | 3.78E-17  | 0.99           |
| 650  | 7.81E-18                                                                 | 6.86E-18  | 1.14           | 8.73E-17                                                                 | 8.63E-17  | 1.01           |

|      |          |          |      |          |          |      |
|------|----------|----------|------|----------|----------|------|
| 700  | 1.91E-17 | 1.70E-17 | 1.12 | 1.84E-16 | 1.80E-16 | 1.02 |
| 750  | 4.24E-17 | 3.79E-17 | 1.12 | 3.58E-16 | 3.48E-16 | 1.03 |
| 800  | 8.65E-17 | 7.80E-17 | 1.11 | 6.50E-16 | 6.30E-16 | 1.03 |
| 850  | 1.64E-16 | 1.50E-16 | 1.09 | 1.12E-15 | 1.08E-15 | 1.04 |
| 900  | 2.95E-16 | 2.70E-16 | 1.09 | 1.84E-15 | 1.77E-15 | 1.04 |
| 950  | 5.03E-16 | 4.64E-16 | 1.08 | 2.89E-15 | 2.80E-15 | 1.03 |
| 1000 | 8.22E-16 | 7.63E-16 | 1.08 | 4.40E-15 | 4.26E-15 | 1.03 |
| 1050 | 1.29E-15 | 1.21E-15 | 1.07 | 6.49E-15 | 6.29E-15 | 1.03 |
| 1100 | 1.97E-15 | 1.85E-15 | 1.06 | 9.32E-15 | 9.04E-15 | 1.03 |
| 1150 | 2.92E-15 | 2.75E-15 | 1.06 | 1.31E-14 | 1.27E-14 | 1.03 |
| 1200 | 4.21E-15 | 3.98E-15 | 1.06 | 1.79E-14 | 1.74E-14 | 1.03 |
| 1250 | 5.93E-15 | 5.63E-15 | 1.05 | 2.41E-14 | 2.35E-14 | 1.03 |
| 1300 | 8.20E-15 | 7.81E-15 | 1.05 | 3.20E-14 | 3.12E-14 | 1.03 |
| 1350 | 1.11E-14 | 1.06E-14 | 1.05 | 4.16E-14 | 4.07E-14 | 1.02 |
| 1400 | 1.48E-14 | 1.42E-14 | 1.04 | 5.35E-14 | 5.23E-14 | 1.02 |
| 1450 | 1.95E-14 | 1.87E-14 | 1.04 | 6.79E-14 | 6.65E-14 | 1.02 |
| 1500 | 2.52E-14 | 2.43E-14 | 1.04 | 8.52E-14 | 8.34E-14 | 1.02 |
| 1550 | 3.22E-14 | 3.11E-14 | 1.04 | 1.06E-13 | 1.04E-13 | 1.02 |
| 1600 | 4.08E-14 | 3.94E-14 | 1.04 | 1.30E-13 | 1.27E-13 | 1.02 |
| 1650 | 5.10E-14 | 4.94E-14 | 1.03 | 1.58E-13 | 1.55E-13 | 1.02 |
| 1700 | 6.31E-14 | 6.12E-14 | 1.03 | 1.91E-13 | 1.87E-13 | 1.02 |
| 1750 | 7.74E-14 | 7.53E-14 | 1.03 | 2.28E-13 | 2.25E-13 | 1.01 |
| 1800 | 9.42E-14 | 9.17E-14 | 1.03 | 2.71E-13 | 2.67E-13 | 1.01 |
| 1850 | 1.14E-13 | 1.11E-13 | 1.03 | 3.21E-13 | 3.16E-13 | 1.02 |
| 1900 | 1.36E-13 | 1.33E-13 | 1.02 | 3.76E-13 | 3.71E-13 | 1.01 |
| 1950 | 1.62E-13 | 1.58E-13 | 1.03 | 4.39E-13 | 4.33E-13 | 1.01 |
| 2000 | 1.92E-13 | 1.87E-13 | 1.03 | 5.09E-13 | 5.03E-13 | 1.01 |

| <b>Table S29:</b> Calculated Rate Coefficients ( $\text{cm}^3\text{molecule}^{-1}\text{s}^{-1}$ ) at a CCSD(T) method for the $\text{CCl}_3+\text{CH}_3\text{OH}$ Reaction at 1atm Pressure. |                                                                              |           |                |                                                                              |           |                |
|----------------------------------------------------------------------------------------------------------------------------------------------------------------------------------------------|------------------------------------------------------------------------------|-----------|----------------|------------------------------------------------------------------------------|-----------|----------------|
|                                                                                                                                                                                              | Rate Coefficient, $k$ ( $\text{cm}^3 \text{ molecule}^{-1} \text{ s}^{-1}$ ) |           |                | Rate Coefficient, $k$ ( $\text{cm}^3 \text{ molecule}^{-1} \text{ s}^{-1}$ ) |           |                |
|                                                                                                                                                                                              | $k_{X3}$ (O-H)                                                               |           |                | $k_{Y1}$ (C-H)                                                               |           |                |
| T(K)                                                                                                                                                                                         | A=TST/W                                                                      | B=TST/ZCT | Ratios<br>=A/B | C=TST/W                                                                      | D=TST/ZCT | Ratios<br>=C/D |
| 200                                                                                                                                                                                          | 2.80E-29                                                                     | 2.62E-28  | 0.11           | 1.31E-26                                                                     | 2.55E-24  | 0.01           |
| 225                                                                                                                                                                                          | 1.49E-27                                                                     | 6.91E-27  | 0.22           | 3.52E-25                                                                     | 1.32E-23  | 0.03           |
| 250                                                                                                                                                                                          | 3.64E-26                                                                     | 1.05E-25  | 0.35           | 4.96E-24                                                                     | 6.21E-23  | 0.08           |
| 275                                                                                                                                                                                          | 5.04E-25                                                                     | 1.05E-24  | 0.48           | 4.40E-23                                                                     | 2.62E-22  | 0.17           |
| 298                                                                                                                                                                                          | 3.89E-24                                                                     | 6.53E-24  | 0.60           | 2.41E-22                                                                     | 8.97E-22  | 0.27           |
| 300                                                                                                                                                                                          | 4.58E-24                                                                     | 7.57E-24  | 0.61           | 2.76E-22                                                                     | 9.94E-22  | 0.28           |
| 325                                                                                                                                                                                          | 3.00E-23                                                                     | 4.22E-23  | 0.71           | 1.32E-21                                                                     | 3.37E-21  | 0.39           |
| 350                                                                                                                                                                                          | 1.52E-22                                                                     | 1.91E-22  | 0.80           | 5.15E-21                                                                     | 1.03E-20  | 0.50           |
| 375                                                                                                                                                                                          | 6.30E-22                                                                     | 7.28E-22  | 0.87           | 1.70E-20                                                                     | 2.83E-20  | 0.60           |
| 400                                                                                                                                                                                          | 2.21E-21                                                                     | 2.40E-21  | 0.92           | 4.88E-20                                                                     | 7.16E-20  | 0.68           |
| 450                                                                                                                                                                                          | 1.84E-20                                                                     | 1.86E-20  | 0.99           | 2.93E-19                                                                     | 3.64E-19  | 0.80           |
| 500                                                                                                                                                                                          | 1.04E-19                                                                     | 1.01E-19  | 1.03           | 1.28E-18                                                                     | 1.44E-18  | 0.89           |
| 550                                                                                                                                                                                          | 4.42E-19                                                                     | 4.20E-19  | 1.05           | 4.41E-18                                                                     | 4.70E-18  | 0.94           |
| 600                                                                                                                                                                                          | 1.52E-18                                                                     | 1.43E-18  | 1.06           | 1.27E-17                                                                     | 1.31E-17  | 0.97           |
| 650                                                                                                                                                                                          | 4.41E-18                                                                     | 4.13E-18  | 1.07           | 3.20E-17                                                                     | 3.22E-17  | 0.99           |
| 700                                                                                                                                                                                          | 1.12E-17                                                                     | 1.05E-17  | 1.07           | 7.22E-17                                                                     | 7.17E-17  | 1.01           |
| 750                                                                                                                                                                                          | 2.58E-17                                                                     | 2.41E-17  | 1.07           | 1.49E-16                                                                     | 1.46E-16  | 1.02           |
| 800                                                                                                                                                                                          | 5.41E-17                                                                     | 5.07E-17  | 1.07           | 2.85E-16                                                                     | 2.79E-16  | 1.02           |
| 850                                                                                                                                                                                          | 1.06E-16                                                                     | 9.93E-17  | 1.07           | 5.12E-16                                                                     | 5.00E-16  | 1.02           |
| 900                                                                                                                                                                                          | 1.94E-16                                                                     | 1.83E-16  | 1.06           | 8.75E-16                                                                     | 8.53E-16  | 1.03           |

|      |          |          |      |          |          |      |
|------|----------|----------|------|----------|----------|------|
| 950  | 3.37E-16 | 3.20E-16 | 1.05 | 1.43E-15 | 1.39E-15 | 1.03 |
| 1000 | 5.61E-16 | 5.34E-16 | 1.05 | 2.24E-15 | 2.19E-15 | 1.02 |
| 1050 | 8.99E-16 | 8.57E-16 | 1.05 | 3.41E-15 | 3.32E-15 | 1.03 |
| 1100 | 1.39E-15 | 1.33E-15 | 1.05 | 5.03E-15 | 4.91E-15 | 1.02 |
| 1150 | 2.09E-15 | 2.00E-15 | 1.05 | 7.22E-15 | 7.05E-15 | 1.02 |
| 1200 | 3.05E-15 | 2.93E-15 | 1.04 | 1.01E-14 | 9.90E-15 | 1.02 |
| 1250 | 4.35E-15 | 4.19E-15 | 1.04 | 1.39E-14 | 1.36E-14 | 1.02 |
| 1300 | 6.07E-15 | 5.87E-15 | 1.03 | 1.88E-14 | 1.84E-14 | 1.02 |
| 1350 | 8.32E-15 | 8.05E-15 | 1.03 | 2.49E-14 | 2.44E-14 | 1.02 |
| 1400 | 1.12E-14 | 1.09E-14 | 1.03 | 3.26E-14 | 3.19E-14 | 1.02 |
| 1450 | 1.48E-14 | 1.44E-14 | 1.03 | 4.19E-14 | 4.12E-14 | 1.02 |
| 1500 | 1.94E-14 | 1.88E-14 | 1.03 | 5.33E-14 | 5.24E-14 | 1.02 |
| 1550 | 2.49E-14 | 2.43E-14 | 1.02 | 6.70E-14 | 6.59E-14 | 1.02 |
| 1600 | 3.18E-14 | 3.10E-14 | 1.03 | 8.34E-14 | 8.20E-14 | 1.02 |
| 1650 | 4.00E-14 | 3.91E-14 | 1.02 | 1.03E-13 | 1.01E-13 | 1.02 |
| 1700 | 4.98E-14 | 4.87E-14 | 1.02 | 1.25E-13 | 1.23E-13 | 1.02 |
| 1750 | 6.15E-14 | 6.02E-14 | 1.02 | 1.52E-13 | 1.49E-13 | 1.02 |
| 1800 | 7.52E-14 | 7.38E-14 | 1.02 | 1.82E-13 | 1.80E-13 | 1.01 |
| 1850 | 9.13E-14 | 8.96E-14 | 1.02 | 2.17E-13 | 2.14E-13 | 1.01 |
| 1900 | 1.10E-13 | 1.08E-13 | 1.02 | 2.57E-13 | 2.54E-13 | 1.01 |
| 1950 | 1.31E-13 | 1.29E-13 | 1.02 | 3.02E-13 | 2.99E-13 | 1.01 |
| 2000 | 1.56E-13 | 1.54E-13 | 1.01 | 3.53E-13 | 3.49E-13 | 1.01 |

**Table S30:** Calculated Rate Coefficients ( $\text{cm}^3\text{molecule}^{-1}\text{s}^{-1}$ ) at a W1 method for the  $\text{CCl}_3+\text{CH}_3\text{SH}$  Reaction at 1atm Pressure.

|             | Rate Coefficient, k (cm <sup>3</sup> molecule <sup>-1</sup> s <sup>-1</sup> ) |                  |                    | Rate Coefficient, k (cm <sup>3</sup> molecule <sup>-1</sup> s <sup>-1</sup> ) |                  |                    |
|-------------|-------------------------------------------------------------------------------|------------------|--------------------|-------------------------------------------------------------------------------|------------------|--------------------|
|             | <b>k<sub>X4</sub> (S-H)</b>                                                   |                  |                    | <b>k<sub>V2</sub> (C-H)</b>                                                   |                  |                    |
| <b>T(K)</b> | <b>A=TST/W</b>                                                                | <b>B=TST/ZCT</b> | <b>Ratios =A/B</b> | <b>C=TST/W</b>                                                                | <b>D=TST/ZCT</b> | <b>Ratios =C/D</b> |
| 200         | 7.20E-18                                                                      | 1.71E-17         | 0.42               | 8.11E-25                                                                      | 1.44E-22         | 0.01               |
| 225         | 2.07E-17                                                                      | 3.47E-17         | 0.60               | 1.37E-23                                                                      | 5.05E-22         | 0.03               |
| 250         | 4.90E-17                                                                      | 6.61E-17         | 0.74               | 1.34E-22                                                                      | 1.70E-21         | 0.08               |
| 275         | 1.01E-16                                                                      | 1.19E-16         | 0.85               | 8.80E-22                                                                      | 5.38E-21         | 0.16               |
| 298         | 1.80E-16                                                                      | 1.94E-16         | 0.93               | 3.82E-21                                                                      | 1.46E-20         | 0.26               |
| 300         | 1.89E-16                                                                      | 2.02E-16         | 0.94               | 4.29E-21                                                                      | 1.59E-20         | 0.27               |
| 325         | 3.25E-16                                                                      | 3.27E-16         | 0.99               | 1.67E-20                                                                      | 4.35E-20         | 0.38               |
| 350         | 5.25E-16                                                                      | 5.08E-16         | 1.03               | 5.41E-20                                                                      | 1.10E-19         | 0.49               |
| 375         | 8.06E-16                                                                      | 7.61E-16         | 1.06               | 1.52E-19                                                                      | 2.58E-19         | 0.59               |
| 400         | 1.19E-15                                                                      | 1.10E-15         | 1.08               | 3.80E-19                                                                      | 5.66E-19         | 0.67               |
| 450         | 2.35E-15                                                                      | 2.15E-15         | 1.09               | 1.81E-18                                                                      | 2.27E-18         | 0.80               |
| 500         | 4.20E-15                                                                      | 3.83E-15         | 1.10               | 6.55E-18                                                                      | 7.43E-18         | 0.88               |
| 550         | 6.99E-15                                                                      | 6.38E-15         | 1.10               | 1.94E-17                                                                      | 2.07E-17         | 0.94               |
| 600         | 1.10E-14                                                                      | 1.01E-14         | 1.09               | 4.93E-17                                                                      | 5.07E-17         | 0.97               |
| 650         | 1.64E-14                                                                      | 1.52E-14         | 1.08               | 1.11E-16                                                                      | 1.12E-16         | 0.99               |
| 700         | 2.37E-14                                                                      | 2.20E-14         | 1.08               | 2.28E-16                                                                      | 2.26E-16         | 1.01               |
| 750         | 3.32E-14                                                                      | 3.10E-14         | 1.07               | 4.34E-16                                                                      | 4.26E-16         | 1.02               |
| 800         | 4.53E-14                                                                      | 4.26E-14         | 1.06               | 7.73E-16                                                                      | 7.55E-16         | 1.02               |
| 850         | 6.03E-14                                                                      | 5.70E-14         | 1.06               | 1.31E-15                                                                      | 1.27E-15         | 1.03               |
| 900         | 7.88E-14                                                                      | 7.48E-14         | 1.05               | 2.11E-15                                                                      | 2.05E-15         | 1.03               |
| 950         | 1.01E-13                                                                      | 9.65E-14         | 1.05               | 3.28E-15                                                                      | 3.18E-15         | 1.03               |
| 1000        | 1.28E-13                                                                      | 1.22E-13         | 1.05               | 4.92E-15                                                                      | 4.78E-15         | 1.03               |
| 1050        | 1.60E-13                                                                      | 1.53E-13         | 1.05               | 7.18E-15                                                                      | 6.98E-15         | 1.03               |
| 1100        | 1.97E-13                                                                      | 1.89E-13         | 1.04               | 1.02E-14                                                                      | 9.92E-15         | 1.03               |
| 1150        | 2.40E-13                                                                      | 2.31E-13         | 1.04               | 1.42E-14                                                                      | 1.38E-14         | 1.03               |

|      |          |          |      |          |          |      |
|------|----------|----------|------|----------|----------|------|
| 1200 | 2.89E-13 | 2.80E-13 | 1.03 | 1.93E-14 | 1.88E-14 | 1.03 |
| 1250 | 3.46E-13 | 3.36E-13 | 1.03 | 2.57E-14 | 2.51E-14 | 1.02 |
| 1300 | 4.10E-13 | 3.99E-13 | 1.03 | 3.38E-14 | 3.30E-14 | 1.02 |
| 1350 | 4.83E-13 | 4.70E-13 | 1.03 | 4.37E-14 | 4.28E-14 | 1.02 |
| 1400 | 5.64E-13 | 5.50E-13 | 1.03 | 5.59E-14 | 5.47E-14 | 1.02 |
| 1450 | 6.55E-13 | 6.40E-13 | 1.02 | 7.05E-14 | 6.90E-14 | 1.02 |
| 1500 | 7.56E-13 | 7.39E-13 | 1.02 | 8.79E-14 | 8.62E-14 | 1.02 |
| 1550 | 8.67E-13 | 8.49E-13 | 1.02 | 1.08E-13 | 1.06E-13 | 1.02 |
| 1600 | 9.90E-13 | 9.71E-13 | 1.02 | 1.33E-13 | 1.30E-13 | 1.02 |
| 1650 | 1.12E-12 | 1.10E-12 | 1.02 | 1.61E-13 | 1.58E-13 | 1.02 |
| 1700 | 1.27E-12 | 1.25E-12 | 1.02 | 1.93E-13 | 1.90E-13 | 1.02 |
| 1750 | 1.43E-12 | 1.41E-12 | 1.01 | 2.30E-13 | 2.27E-13 | 1.01 |
| 1800 | 1.61E-12 | 1.58E-12 | 1.02 | 2.73E-13 | 2.69E-13 | 1.01 |
| 1850 | 1.80E-12 | 1.77E-12 | 1.02 | 3.21E-13 | 3.17E-13 | 1.01 |
| 1900 | 2.00E-12 | 1.97E-12 | 1.02 | 3.76E-13 | 3.71E-13 | 1.01 |
| 1950 | 2.22E-12 | 2.19E-12 | 1.01 | 4.37E-13 | 4.31E-13 | 1.01 |
| 2000 | 2.46E-12 | 2.43E-12 | 1.01 | 5.05E-13 | 4.99E-13 | 1.01 |

**Table S31:** Calculated Rate Coefficients ( $\text{cm}^3\text{molecule}^{-1}\text{s}^{-1}$ ) at a CCSD(T) method for the  $\text{CCl}_3+\text{CH}_3\text{SH}$  Reaction at 1atm Pressure.

|      | Rate Coefficient, k ( $\text{cm}^3\text{ molecule}^{-1}\text{ s}^{-1}$ ) |           |             | Rate Coefficient, k ( $\text{cm}^3\text{ molecule}^{-1}\text{ s}^{-1}$ ) |           |             |
|------|--------------------------------------------------------------------------|-----------|-------------|--------------------------------------------------------------------------|-----------|-------------|
|      | $k_{\text{X4}}(\text{S-H})$                                              |           |             | $k_{\text{Y2}}(\text{C-H})$                                              |           |             |
| T(K) | A=TST/W                                                                  | B=TST/ZCT | Ratios =A/B | C=TST/W                                                                  | D=TST/ZCT | Ratios =C/D |
| 200  | 1.16E-18                                                                 | 3.96E-18  | 0.29        | 5.48E-27                                                                 | 2.23E-24  | 0.00        |
| 225  | 4.06E-18                                                                 | 8.84E-18  | 0.46        | 1.60E-25                                                                 | 1.05E-23  | 0.02        |



|      |          |          |      |          |          |      |
|------|----------|----------|------|----------|----------|------|
| 250  | 1.13E-17 | 1.85E-17 | 0.61 | 2.43E-24 | 4.59E-23 | 0.05 |
| 275  | 2.64E-17 | 3.60E-17 | 0.73 | 2.28E-23 | 1.85E-22 | 0.12 |
| 298  | 5.19E-17 | 6.31E-17 | 0.82 | 1.31E-22 | 6.16E-22 | 0.21 |
| 300  | 5.48E-17 | 6.60E-17 | 0.83 | 1.50E-22 | 6.82E-22 | 0.22 |
| 325  | 1.03E-16 | 1.15E-16 | 0.90 | 7.51E-22 | 2.28E-21 | 0.33 |
| 350  | 1.80E-16 | 1.89E-16 | 0.95 | 3.03E-21 | 6.91E-21 | 0.44 |
| 375  | 2.96E-16 | 2.99E-16 | 0.99 | 1.03E-20 | 1.91E-20 | 0.54 |
| 400  | 4.63E-16 | 4.56E-16 | 1.02 | 3.03E-20 | 4.85E-20 | 0.62 |
| 450  | 1.01E-15 | 9.64E-16 | 1.05 | 1.90E-19 | 2.50E-19 | 0.76 |
| 500  | 1.95E-15 | 1.84E-15 | 1.06 | 8.54E-19 | 1.00E-18 | 0.85 |
| 550  | 3.46E-15 | 3.25E-15 | 1.06 | 3.03E-18 | 3.32E-18 | 0.91 |
| 600  | 5.73E-15 | 5.38E-15 | 1.07 | 8.93E-18 | 9.39E-18 | 0.95 |
| 650  | 8.98E-15 | 8.46E-15 | 1.06 | 2.29E-17 | 2.34E-17 | 0.98 |
| 700  | 1.35E-14 | 1.27E-14 | 1.06 | 5.23E-17 | 5.26E-17 | 0.99 |
| 750  | 1.95E-14 | 1.85E-14 | 1.05 | 1.09E-16 | 1.09E-16 | 1.00 |
| 800  | 2.74E-14 | 2.61E-14 | 1.05 | 2.11E-16 | 2.09E-16 | 1.01 |
| 850  | 3.75E-14 | 3.58E-14 | 1.05 | 3.84E-16 | 3.77E-16 | 1.02 |
| 900  | 5.01E-14 | 4.80E-14 | 1.04 | 6.61E-16 | 6.48E-16 | 1.02 |
| 950  | 6.56E-14 | 6.31E-14 | 1.04 | 1.09E-15 | 1.06E-15 | 1.03 |
| 1000 | 8.46E-14 | 8.15E-14 | 1.04 | 1.72E-15 | 1.68E-15 | 1.02 |
| 1050 | 1.07E-13 | 1.04E-13 | 1.03 | 2.63E-15 | 2.57E-15 | 1.02 |
| 1100 | 1.34E-13 | 1.30E-13 | 1.03 | 3.90E-15 | 3.81E-15 | 1.02 |
| 1150 | 1.66E-13 | 1.61E-13 | 1.03 | 5.63E-15 | 5.51E-15 | 1.02 |
| 1200 | 2.03E-13 | 1.97E-13 | 1.03 | 7.93E-15 | 7.77E-15 | 1.02 |
| 1250 | 2.45E-13 | 2.39E-13 | 1.03 | 1.10E-14 | 1.07E-14 | 1.03 |
| 1300 | 2.94E-13 | 2.87E-13 | 1.02 | 1.48E-14 | 1.45E-14 | 1.02 |
| 1350 | 3.49E-13 | 3.42E-13 | 1.02 | 1.97E-14 | 1.94E-14 | 1.02 |

|      |          |          |      |          |          |      |
|------|----------|----------|------|----------|----------|------|
| 1400 | 4.12E-13 | 4.03E-13 | 1.02 | 2.59E-14 | 2.54E-14 | 1.02 |
| 1450 | 4.82E-13 | 4.73E-13 | 1.02 | 3.34E-14 | 3.29E-14 | 1.02 |
| 1500 | 5.61E-13 | 5.51E-13 | 1.02 | 4.27E-14 | 4.20E-14 | 1.02 |
| 1550 | 6.49E-13 | 6.38E-13 | 1.02 | 5.38E-14 | 5.29E-14 | 1.02 |
| 1600 | 7.46E-13 | 7.34E-13 | 1.02 | 6.71E-14 | 6.61E-14 | 1.02 |
| 1650 | 8.54E-13 | 8.41E-13 | 1.02 | 8.28E-14 | 8.16E-14 | 1.01 |
| 1700 | 9.72E-13 | 9.57E-13 | 1.02 | 1.01E-13 | 9.99E-14 | 1.01 |
| 1750 | 1.10E-12 | 1.09E-12 | 1.01 | 1.23E-13 | 1.21E-13 | 1.02 |
| 1800 | 1.24E-12 | 1.23E-12 | 1.01 | 1.48E-13 | 1.46E-13 | 1.01 |
| 1850 | 1.40E-12 | 1.38E-12 | 1.01 | 1.77E-13 | 1.74E-13 | 1.02 |
| 1900 | 1.56E-12 | 1.54E-12 | 1.01 | 2.09E-13 | 2.07E-13 | 1.01 |
| 1950 | 1.74E-12 | 1.72E-12 | 1.01 | 2.47E-13 | 2.44E-13 | 1.01 |
| 2000 | 1.94E-12 | 1.92E-12 | 1.01 | 2.89E-13 | 2.86E-13 | 1.01 |

## References

- 1 B. Ruscic, R.E. Pinzon, M.L. Morton, N.K. Srinivasan, M-C. Su, J.W. Sutherland, J.V. Michael, *J. Phys. Chem. A* 2006, **110**, 6592-6601
- 2 J.W. Hudgens, R.D. Johnson, R.S. Timonen, J.A. Seetula, D. J. *J. Phys. Chem.* 1991, **95**, 4400-4405
- 3 L.V. Gurvich, I. V. Veyts, C. B. Alcock, *Thermodynamic Properties of Individual Substances*, Fourth Edition, Hemisphere Pub. Co., New York, 1989
- 4 J.D. Cox, D.D. Wagman, V.A. Medvedev, *CODATA Key Values for Thermodynamics*. Hemisphere, New York, 1989
- 5 B. Ruscic, J.E. Boggs, A. Burcat, A.G. Csaszar, J. Demaison, R. Janoschek, J.M.L. Martin, M.L. Morton, M.J. Rossi, J.F. Stanton, P.G. Szalay, P.R. Westmoreland, F. Zabel, T. Berces, *J. Phys. Chem.* 2005, **34**, 573.
- 6 NIST Chemistry Webbook (<http://webbook.nist.gov/chemistry>)
- 7 R.T. Bise, H. Choi, H.B. Pedersen, D.H. Mordaunt, D.M. Neumark, *J. Chem. Phys.* 1999, **110**, 805-816
- 8 B. Nagy, P. Szakacs, J. Csontos, Z. Rolik, G. Tasi, M. Kallay, *J. Phys. Chem. A* 2011, **115**, 7823-7833
